# Supplementary material for: Discovery of a First-in-Class Degrader for the Lipid Kinase PIKfyve
Source: PubMed Central journal article supplement (PMC10510382; doi:10.1021/acs.jmedchem.3c00912), 2023-08-21
Supplement: jm3c00912_si_001.pdf [file jm3c00912_si_001.pdf]

# Supporting Information

## Discovery of a First-in-Class Degradar for the Lipid Kinase PIKfyve

Chungen Li<sup>1,#</sup>, Yuanyuan Qiao<sup>2,4,#</sup>, Xia Jiang<sup>2</sup>, Lianchao Liu<sup>1</sup>, Yang Zheng<sup>2</sup>, Yudi Qiu<sup>1</sup>, Caleb Cheng<sup>2</sup>, Fengtao Zhou<sup>8</sup>, Yang Zhou<sup>8</sup>, Weixue Huang<sup>1</sup>, Xiaomei Ren<sup>1</sup>, Yuzhuo Wang<sup>3</sup>, Zhen Wang<sup>1,\*</sup>, Arul M. Chinnaiyan<sup>2,4,5,6,\*</sup>, Ke Ding<sup>1,7,8,\*</sup>

<sup>1</sup> State Key Laboratory of Chemical Biology, Shanghai Institute of Organic Chemistry, Chinese Academy of Sciences, #345 Lingling Rd., Shanghai 200032, People's Republic of China

<sup>2</sup> Michigan Center for Translational Pathology, University of Michigan, Ann Arbor, MI 48109, USA.

<sup>3</sup> The Vancouver Prostate Centre, Vancouver General Hospital and Department of Urologic Sciences, The University of British Columbia, Vancouver, V6H 3Z6 BC, Canada.

<sup>4</sup> Department of Pathology, University of Michigan, Ann Arbor, MI 48109, USA.

<sup>5</sup> Howard Hughes Medical Institute, University of Michigan, Ann Arbor, MI 48109, USA.

<sup>6</sup> Department of Urology, University of Michigan, Ann Arbor, MI 48109, USA.

<sup>7</sup> Institute of Basic Medicine and Cancer (IBMC), Chinese Academy of Sciences, Hangzhou, Zhejiang 310022, People's Republic of China

<sup>8</sup> International Cooperative Laboratory of Traditional Chinese Medicine Modernization and Innovative Drug Discovery of Chinese Ministry of Education

(MOE), Guangzhou City Key Laboratory of Precision Chemical Drug Development,  
College of Pharmacy, Jinan University, 855 Xingye Avenue East, Guangzhou  
511400, People's Republic of China

#C. L. and Y. Q. contributed equally to this work.

\*Email: wangz@sioc.ac.cn (Z.W.);\_arul@med.umich.edu (A.M.C);\_dingk@sioc.ac.cn;

Tel: +86-21-5492 5100 (K.D.)

## **Table of Contents**

|                                                               |               |
|---------------------------------------------------------------|---------------|
| <b>1. NMR spectra and HPLC traces of final compounds.....</b> | <b>S3-S46</b> |
|---------------------------------------------------------------|---------------|

# NMR spectra and HPLC traces of final compounds

## Compound 7a

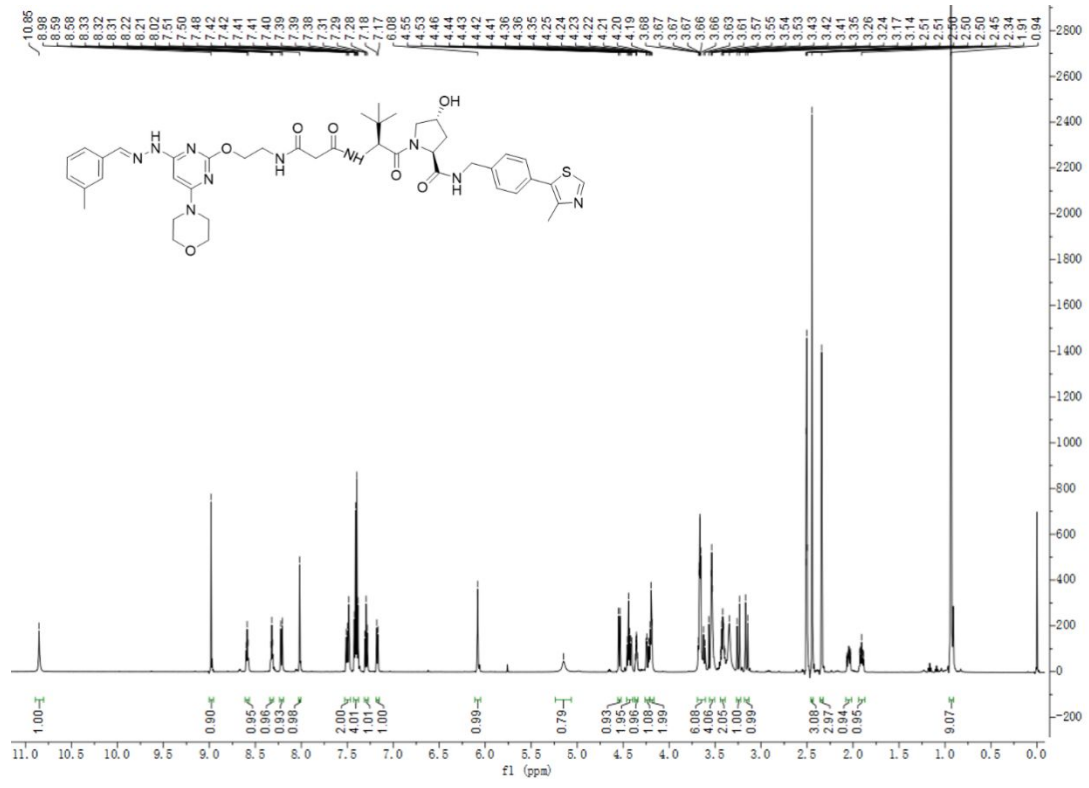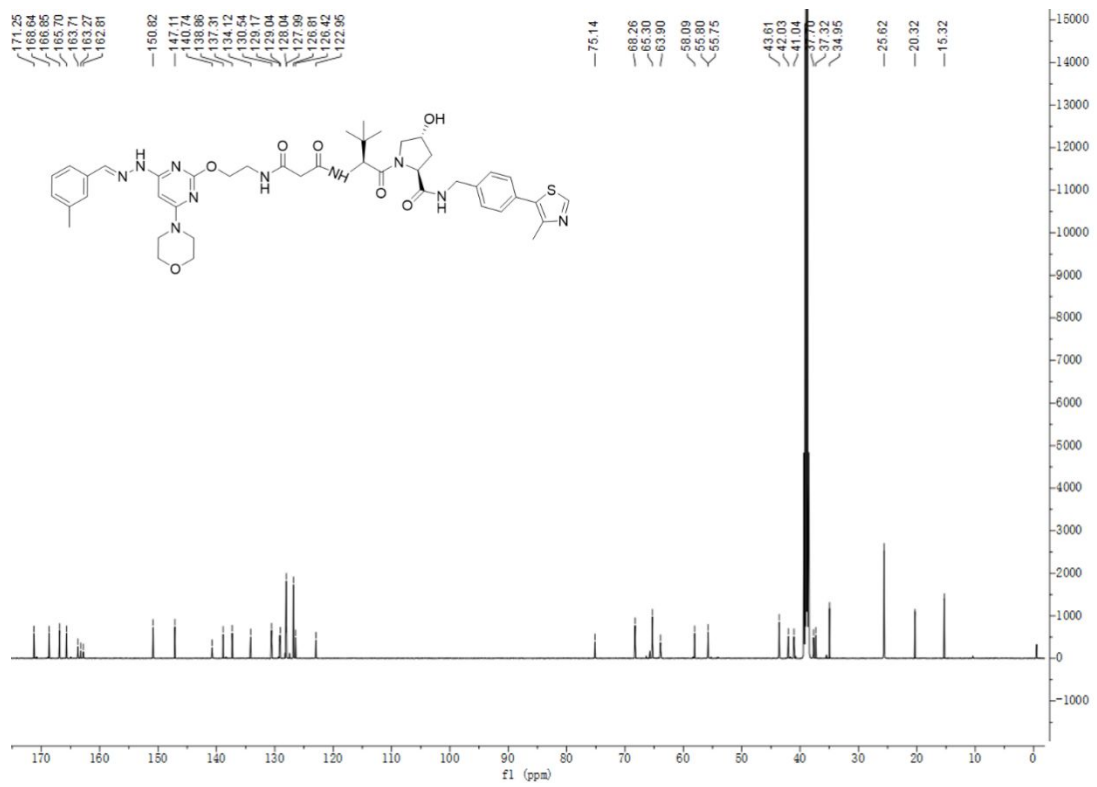

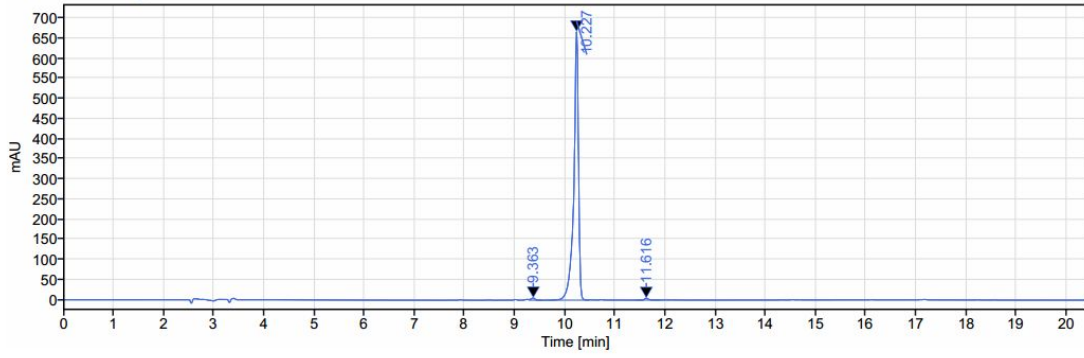

Signal: DAD1A,Sig=254,4 Ref=off

| RT [min] | Type       | Width [min] | Area           | Height | Area%         | Name |
|----------|------------|-------------|----------------|--------|---------------|------|
| 9.363    | VB         | 0.26        | 31.90          | 5.51   | 0.73          |      |
| 10.227   | VV         | 0.77        | 4330.01        | 667.71 | 98.63         |      |
| 11.616   | BV         | 0.47        | 28.35          | 4.77   | 0.65          |      |
|          | <b>Sum</b> |             | <b>4390.27</b> |        | <b>100.00</b> |      |

Compound 7b

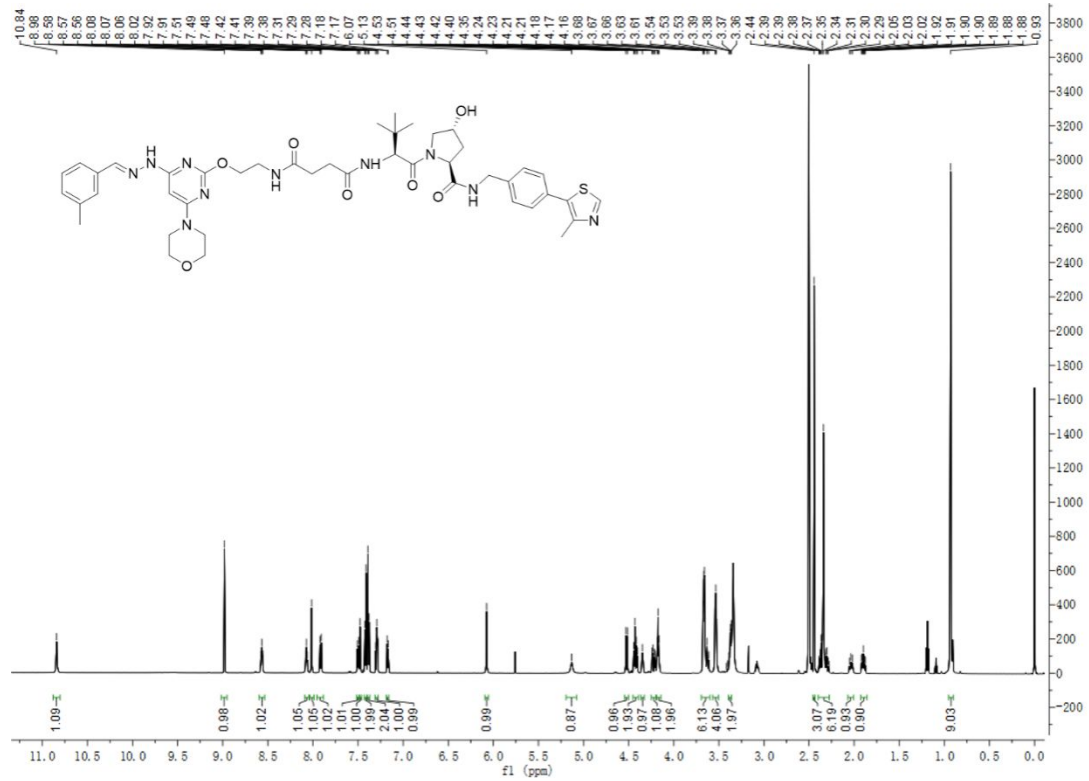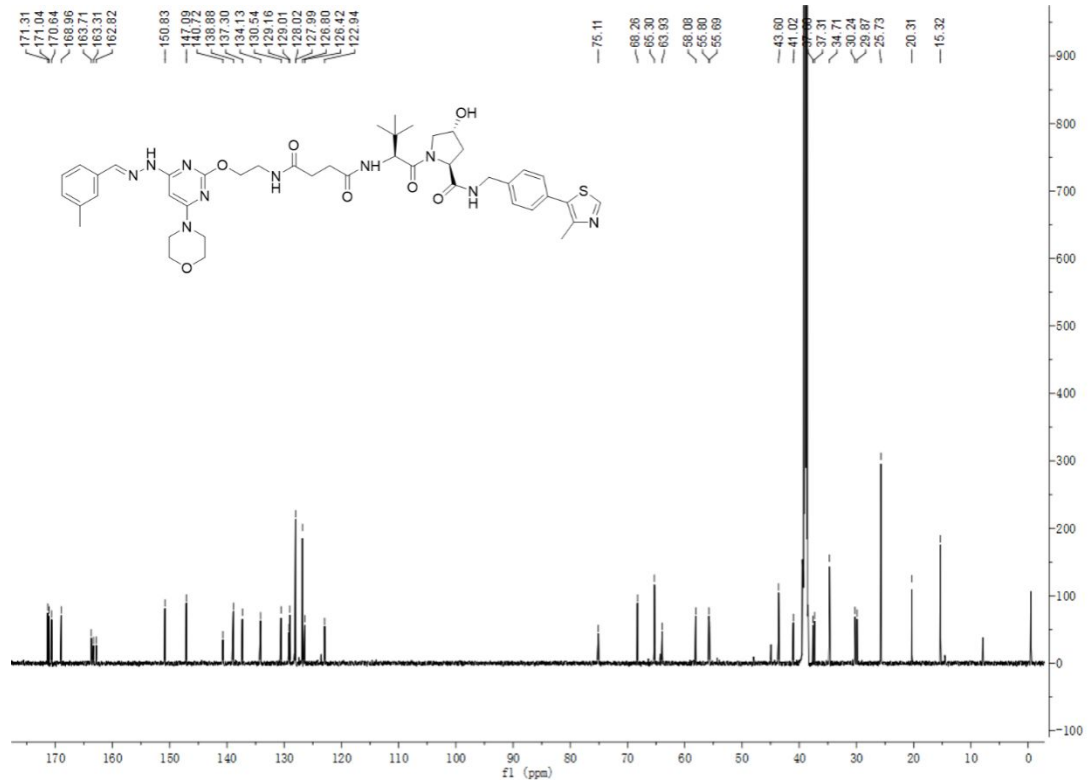

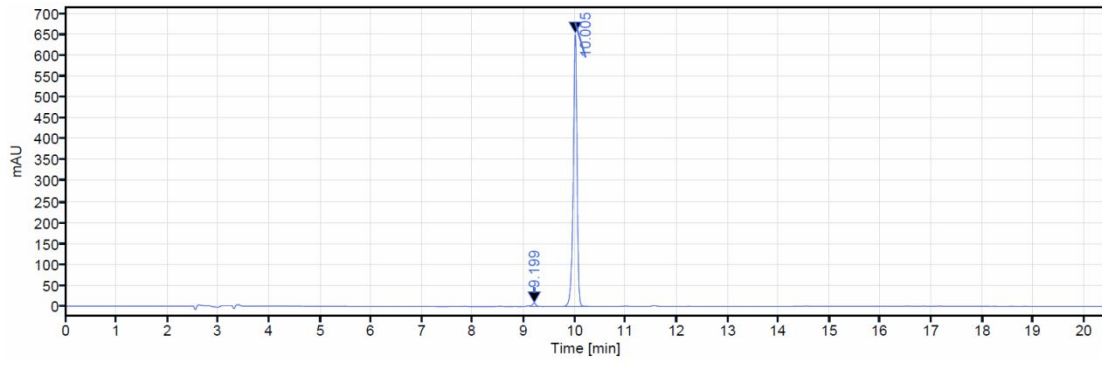

Signal: DAD1A,Sig=254,4 Ref=off

| RT [min] | Type | Width [min] | Area    | Height | Area%  | Name |
|----------|------|-------------|---------|--------|--------|------|
| 9.199    | VB   | 0.26        | 43.71   | 8.38   | 1.27   |      |
| 10.005   | BV   | 0.70        | 3400.60 | 655.48 | 98.73  |      |
|          |      | <b>Sum</b>  | 3444.32 |        | 100.00 |      |

Compound 7c

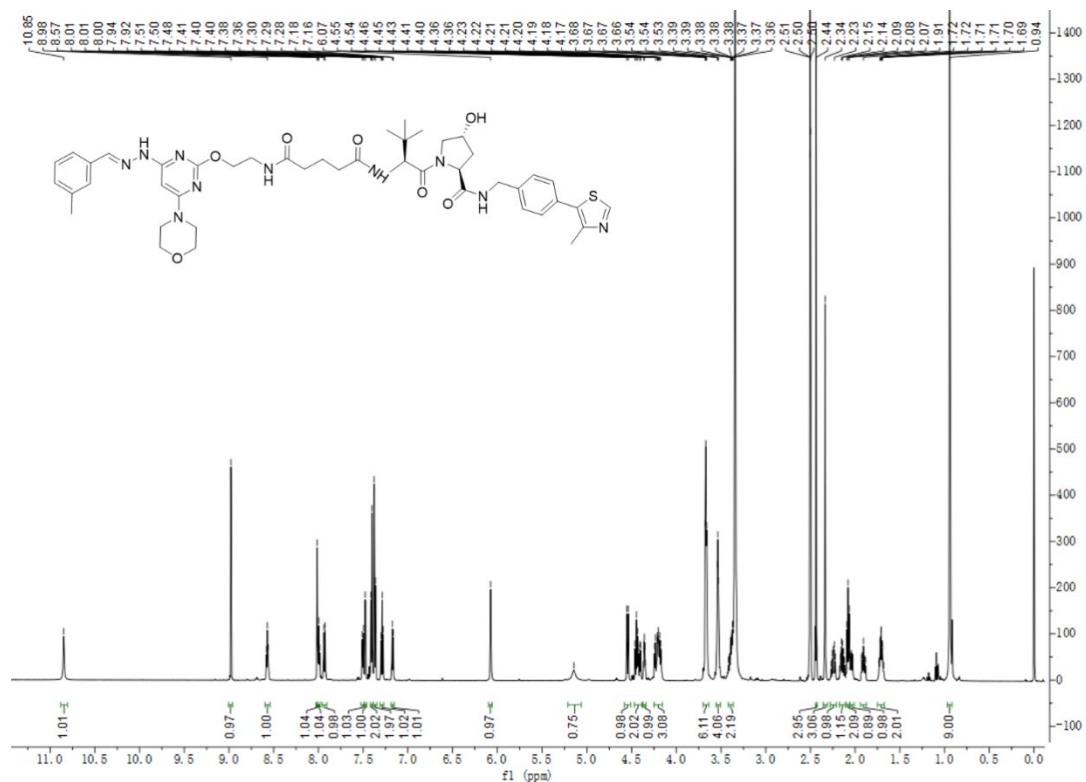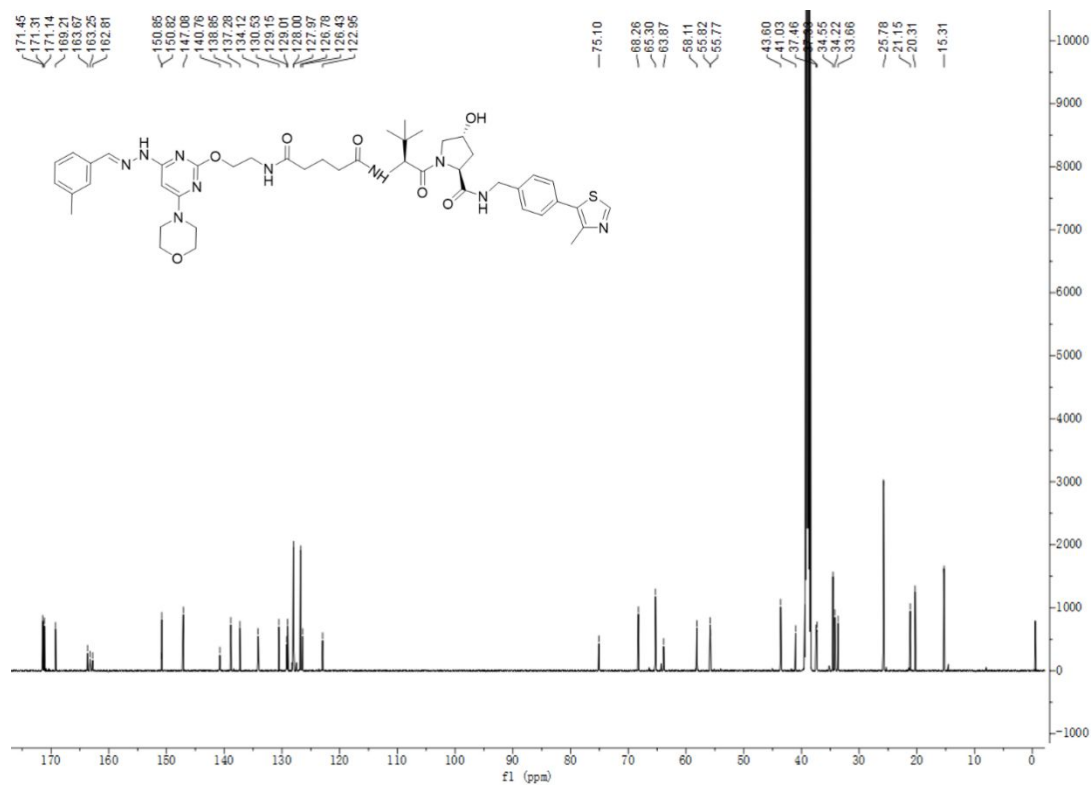

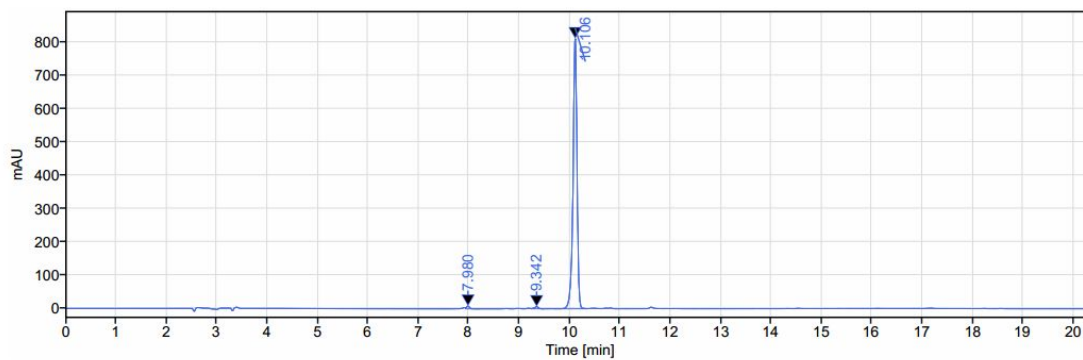

Signal: DAD1A,Sig=254,4 Ref=off

| RT [min] | Type       | Width [min] | Area           | Height | Area%         | Name |
|----------|------------|-------------|----------------|--------|---------------|------|
| 7.980    | VB         | 0.28        | 35.28          | 8.50   | 0.79          |      |
| 9.342    | VB         | 0.25        | 35.26          | 6.42   | 0.78          |      |
| 10.106   | VV         | 0.66        | 4421.70        | 810.54 | 98.43         |      |
|          | <b>Sum</b> |             | <b>4492.24</b> |        | <b>100.00</b> |      |



# Compound 7d

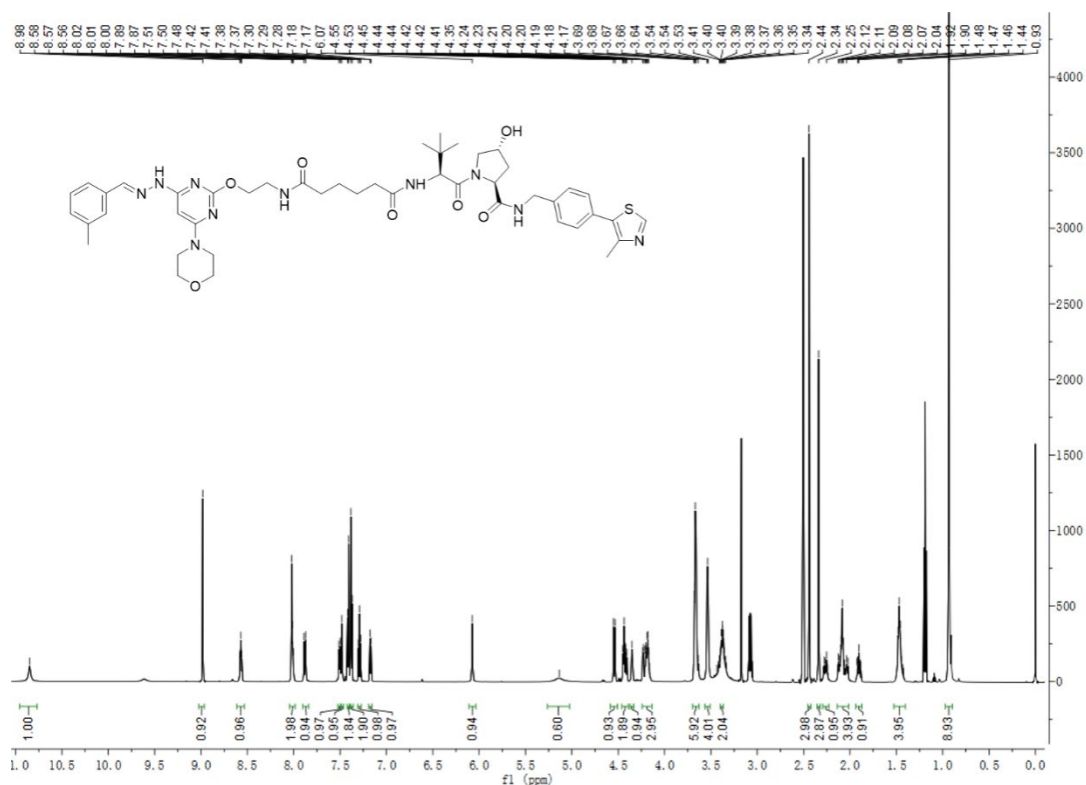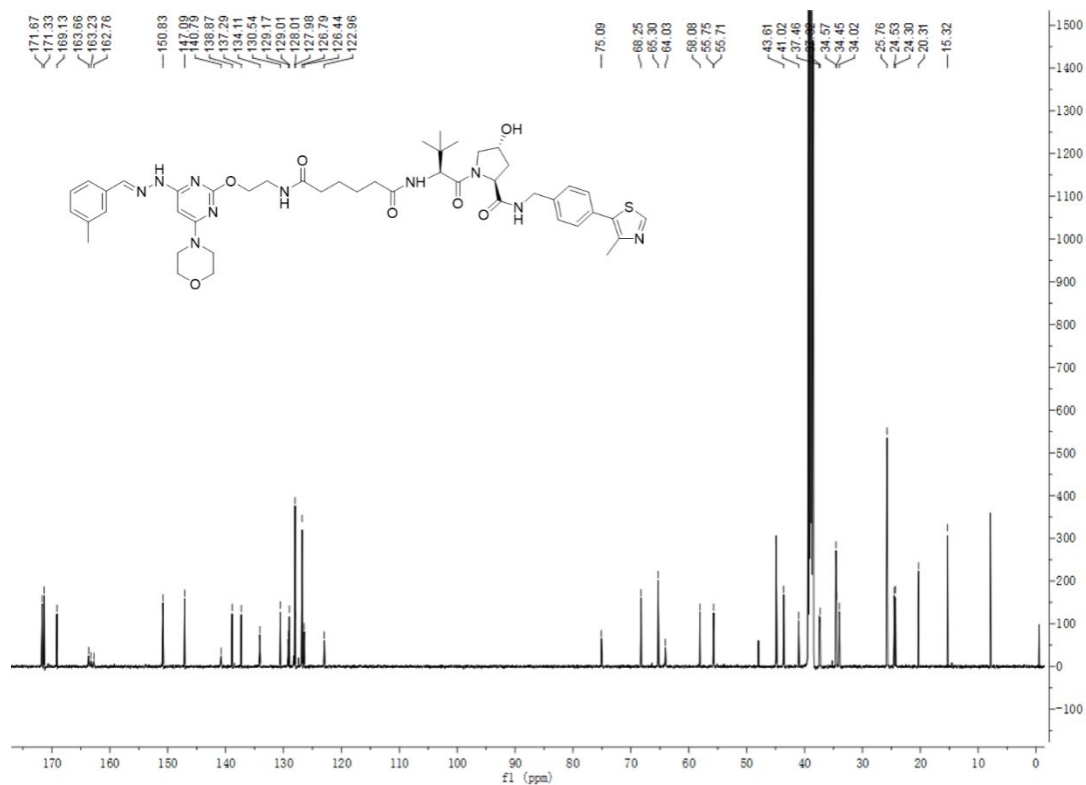

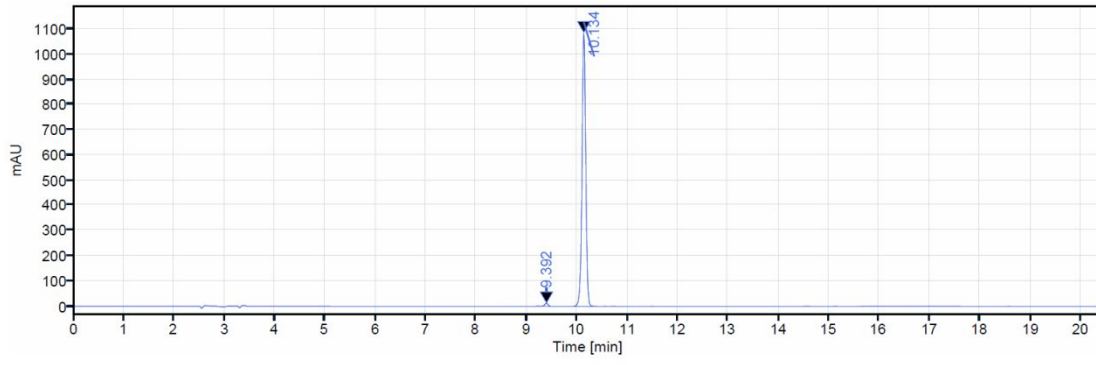

Signal: DAD1A,Sig=254,4 Ref=off

| RT [min] | Type | Width [min] | Area    | Height  | Area%  | Name |
|----------|------|-------------|---------|---------|--------|------|
| 9.392    | MM m | 0.15        | 51.90   | 11.76   | 0.92   |      |
| 10.134   | BV   | 0.68        | 5595.25 | 1086.09 | 99.08  |      |
|          |      | <b>Sum</b>  | 5647.15 |         | 100.00 |      |

Compound 7e

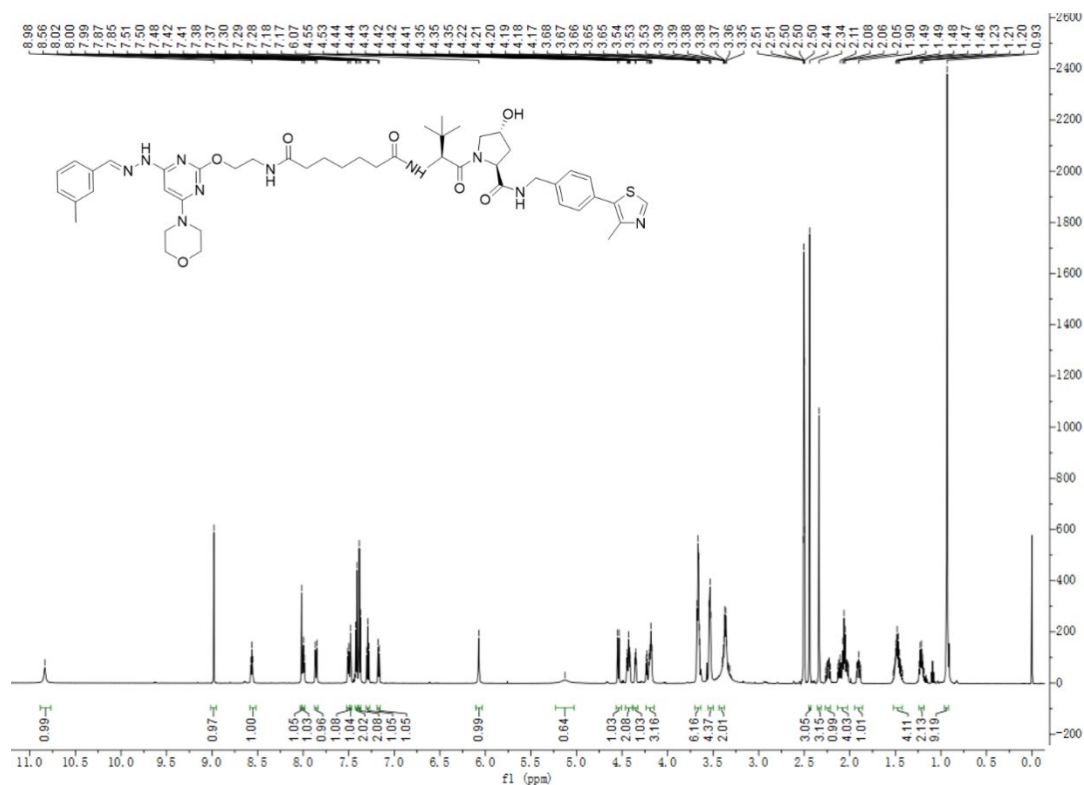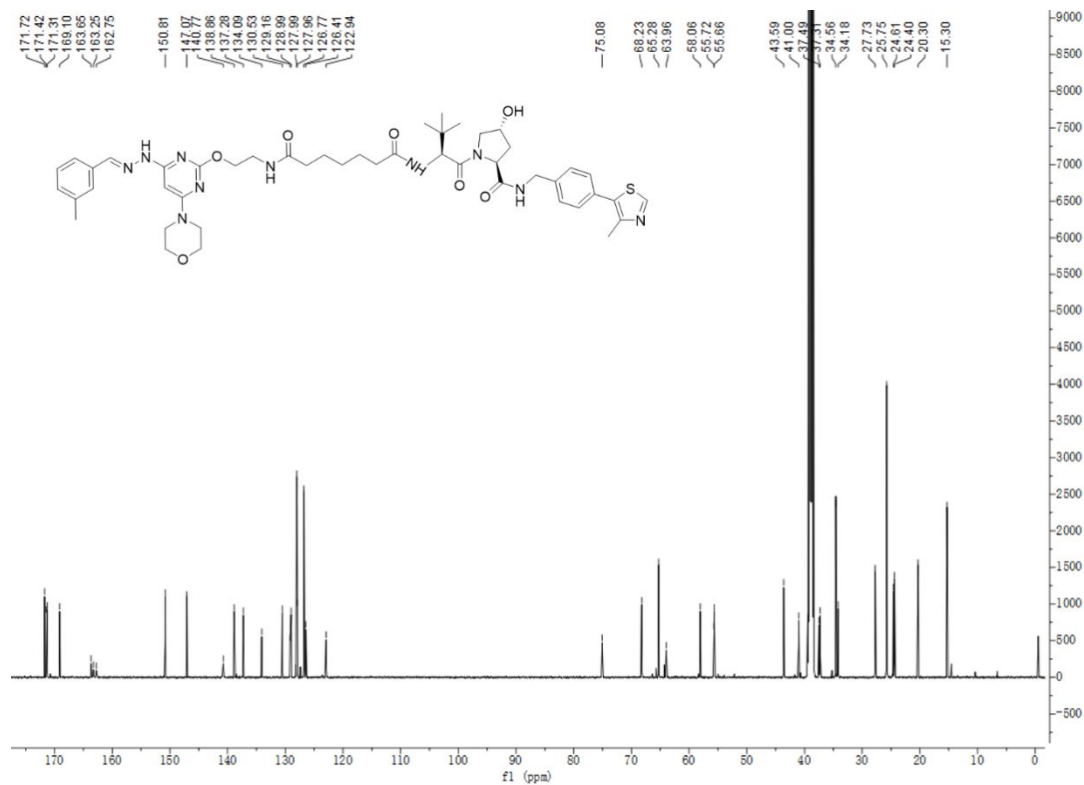

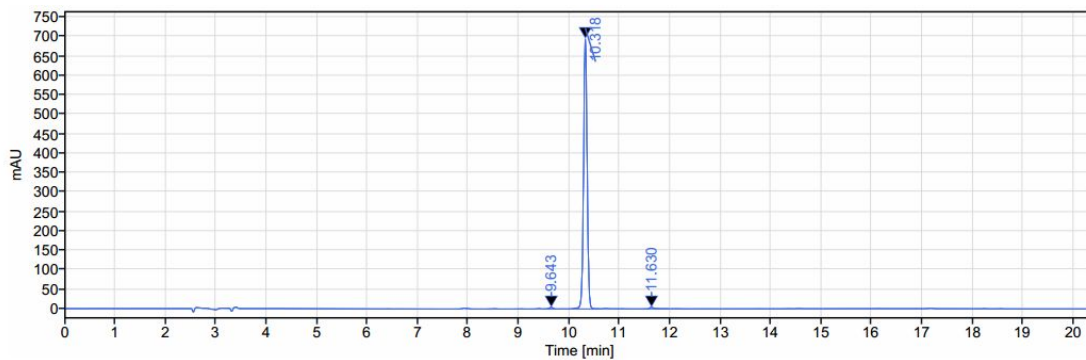

Signal: DAD1A,Sig=254,4 Ref=off

| RT [min] | Type       | Width [min] | Area           | Height | Area%         | Name |
|----------|------------|-------------|----------------|--------|---------------|------|
| 9.643    | VB         | 0.29        | 24.25          | 4.75   | 0.70          |      |
| 10.318   | VV         | 0.67        | 3428.93        | 695.96 | 98.54         |      |
| 11.630   | BB         | 0.49        | 26.56          | 4.56   | 0.76          |      |
|          | <b>Sum</b> |             | <b>3479.74</b> |        | <b>100.00</b> |      |

Compound 7f

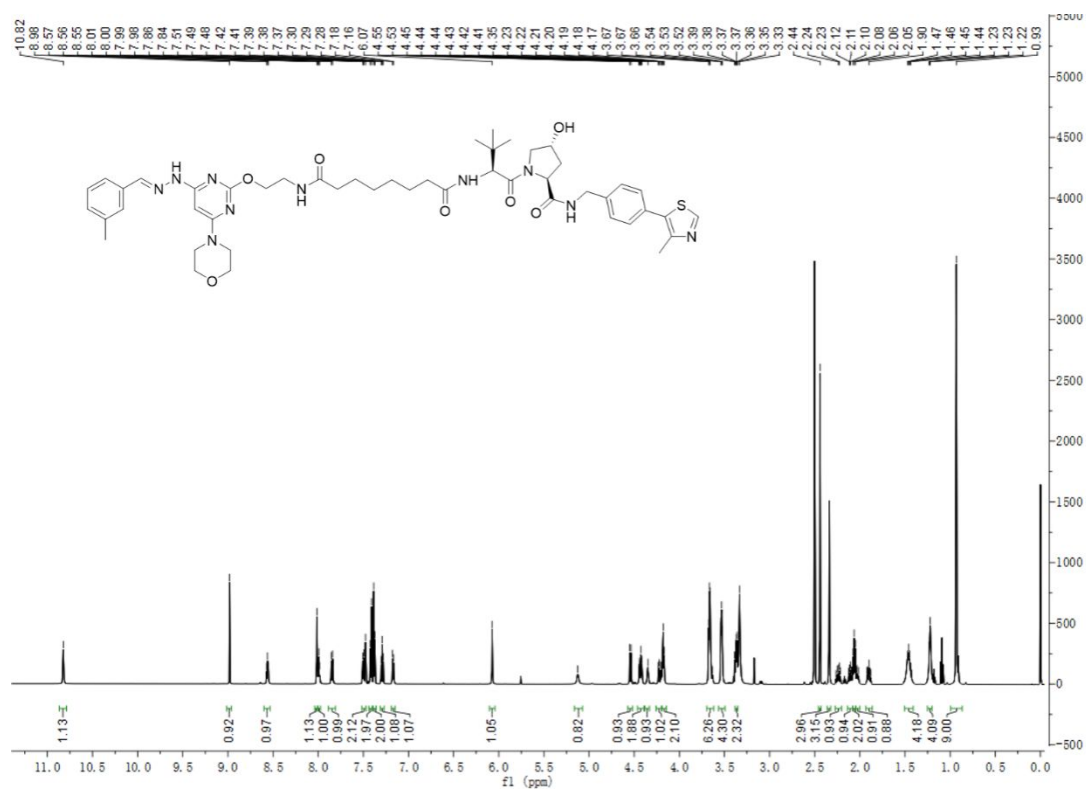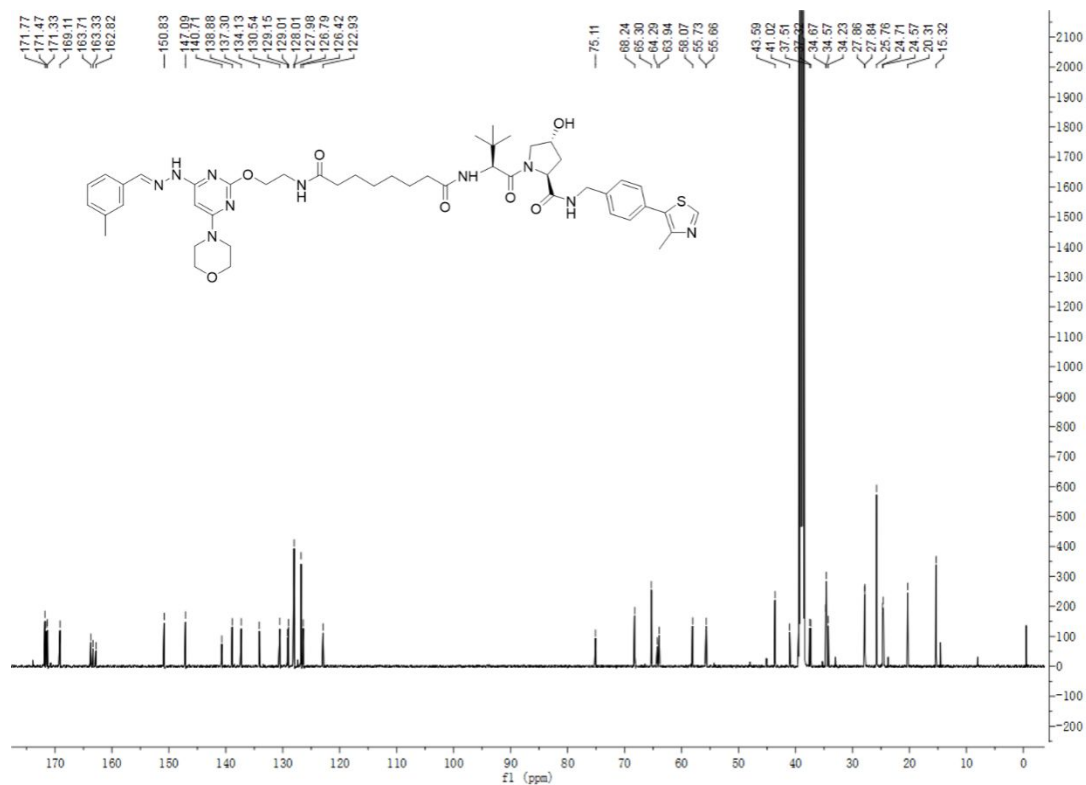

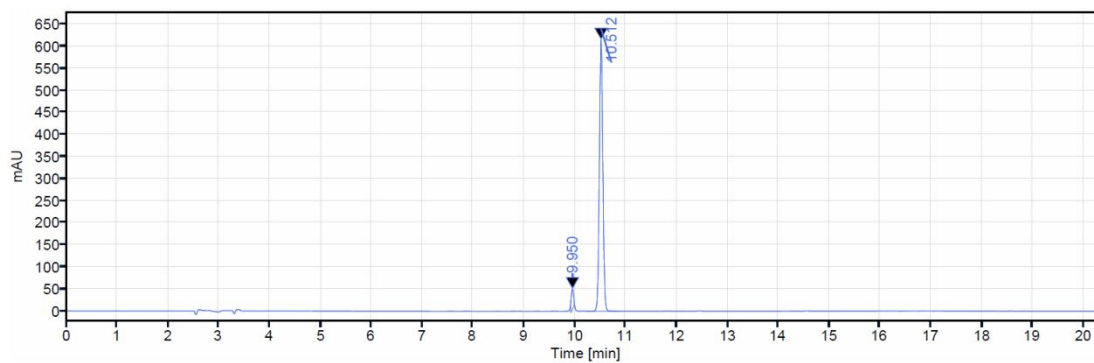

Signal: DAD1A,Sig=254,4 Ref=off

| RT [min] | Type | Width [min] | Area    | Height | Area%  | Name |
|----------|------|-------------|---------|--------|--------|------|
| 9.950    | MM m | 0.07        | 136.50  | 46.04  | 4.45   |      |
| 10.512   | VV   | 0.63        | 2930.35 | 616.79 | 95.55  |      |
|          |      | <b>Sum</b>  | 3066.84 |        | 100.00 |      |



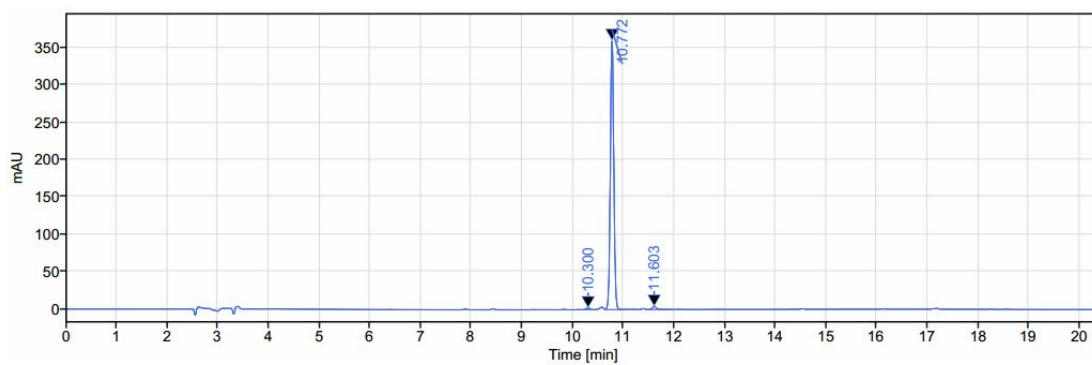

Signal: DAD1A,Sig=254,4 Ref=off

| RT [min] | Type | Width [min] | Area    | Height | Area%  | Name |
|----------|------|-------------|---------|--------|--------|------|
| 10.300   | VB   | 0.23        | 12.70   | 2.55   | 0.73   |      |
| 10.772   | VV   | 0.36        | 1708.46 | 360.30 | 97.86  |      |
| 11.603   | VB   | 0.47        | 24.57   | 4.46   | 1.41   |      |
|          |      | <b>Sum</b>  | 1745.73 |        | 100.00 |      |



# Compound 7h

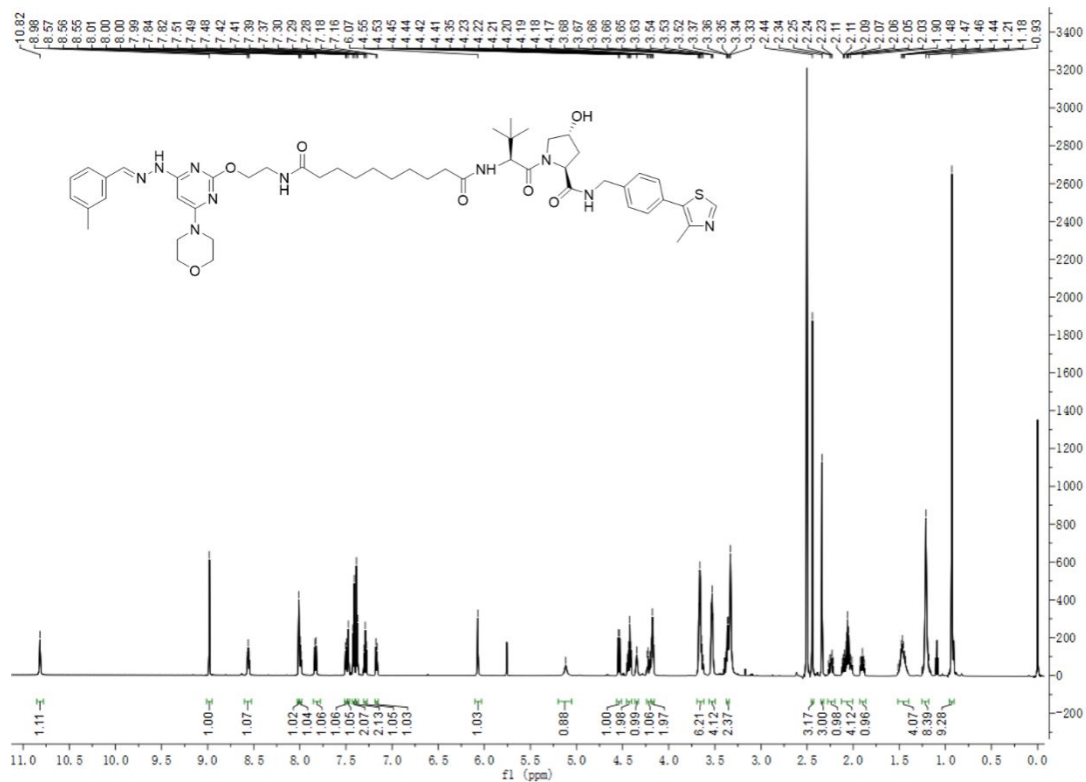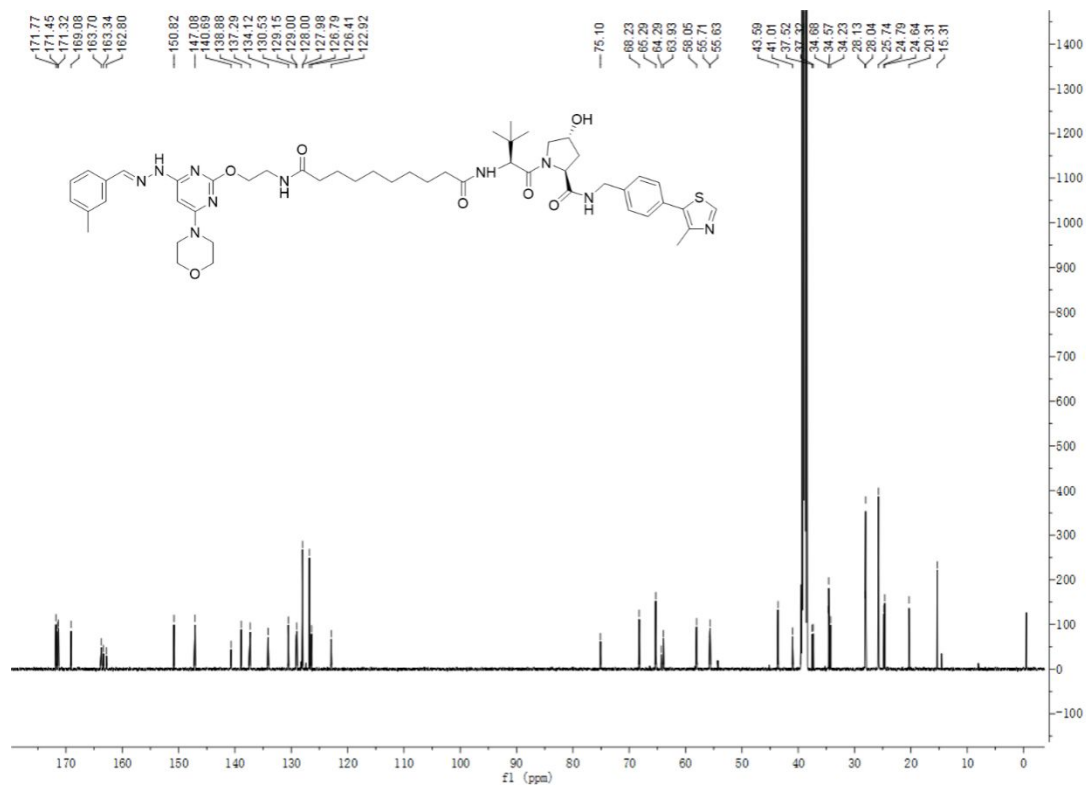

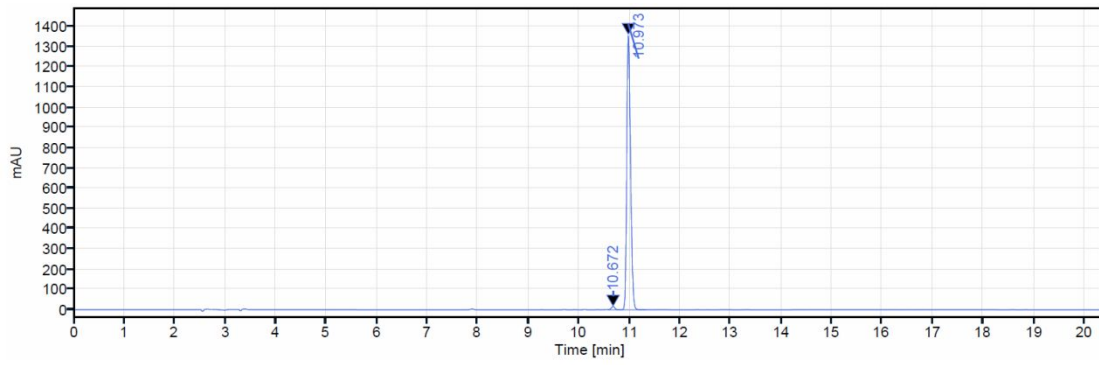

Signal: DAD1A,Sig=254,4 Ref=off

| RT [min]   | Type | Width [min] | Area    | Height  | Area%  | Name |
|------------|------|-------------|---------|---------|--------|------|
| 10.672     | VV   | 0.24        | 85.25   | 16.42   | 1.18   |      |
| 10.973     | VV   | 0.51        | 7138.02 | 1360.86 | 98.82  |      |
| <b>Sum</b> |      |             | 7223.27 |         | 100.00 |      |

Compound **7i**

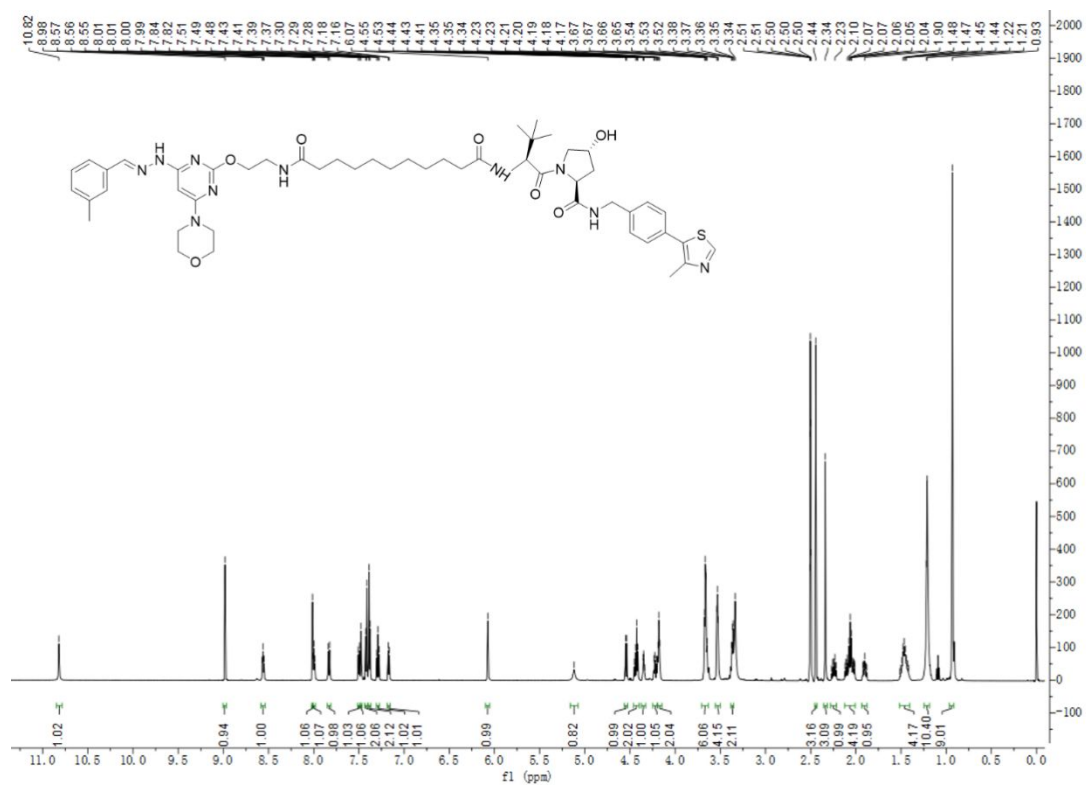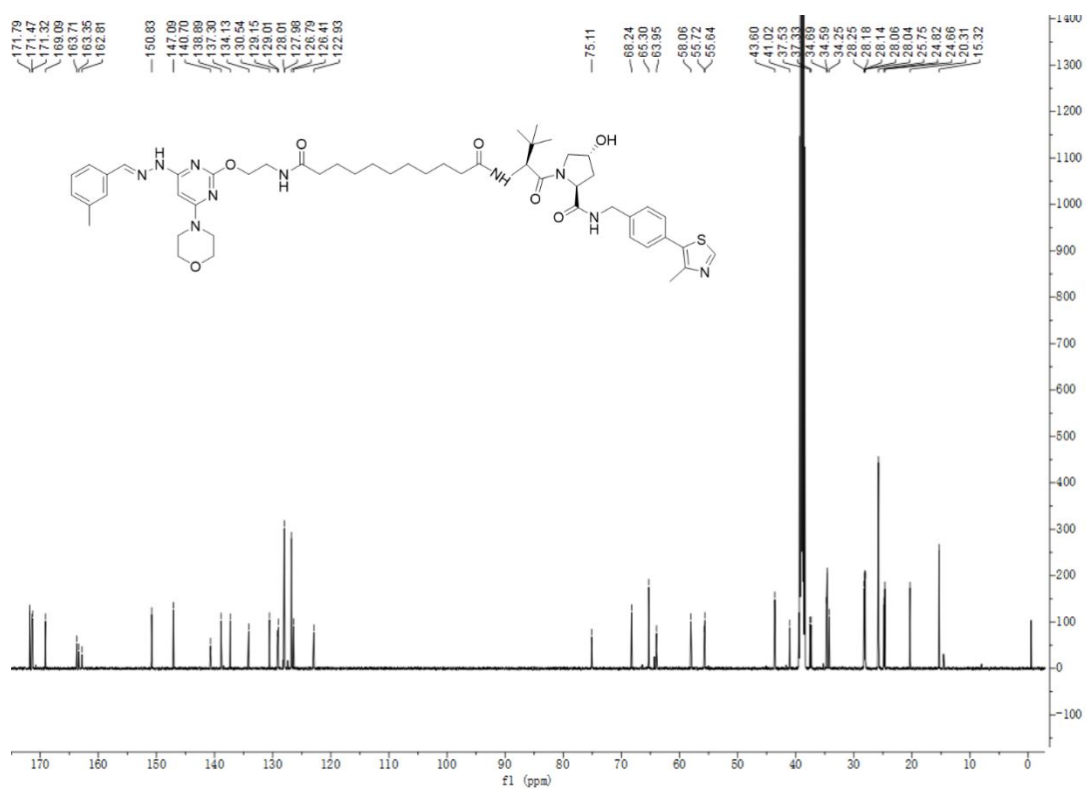

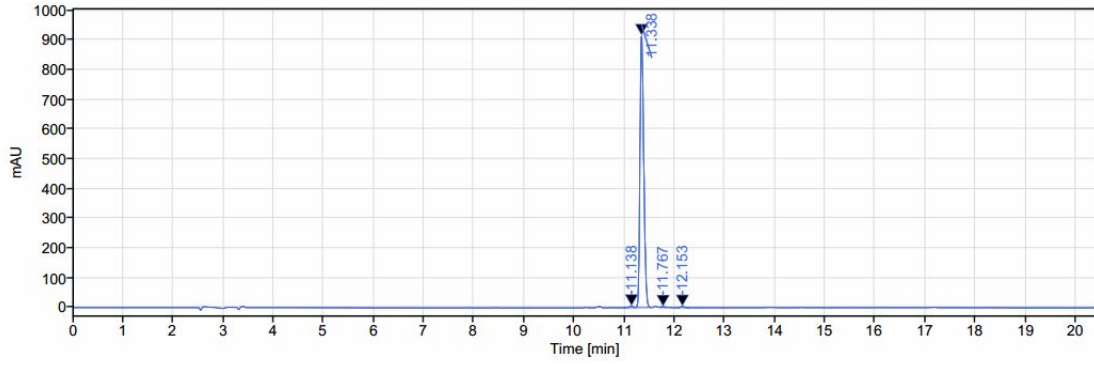

Signal: DAD1A,Sig=254,4 Ref=off

| RT [min]   | Type | Width [min] | Area           | Height | Area%         | Name |
|------------|------|-------------|----------------|--------|---------------|------|
| 11.138     | BV   | 0.25        | 32.25          | 6.08   | 0.67          |      |
| 11.338     | VB   | 0.33        | 4764.93        | 916.26 | 98.36         |      |
| 11.767     | VV   | 0.17        | 23.28          | 3.86   | 0.48          |      |
| 12.153     | BB   | 0.25        | 24.11          | 5.15   | 0.50          |      |
| <b>Sum</b> |      |             | <b>4844.57</b> |        | <b>100.00</b> |      |



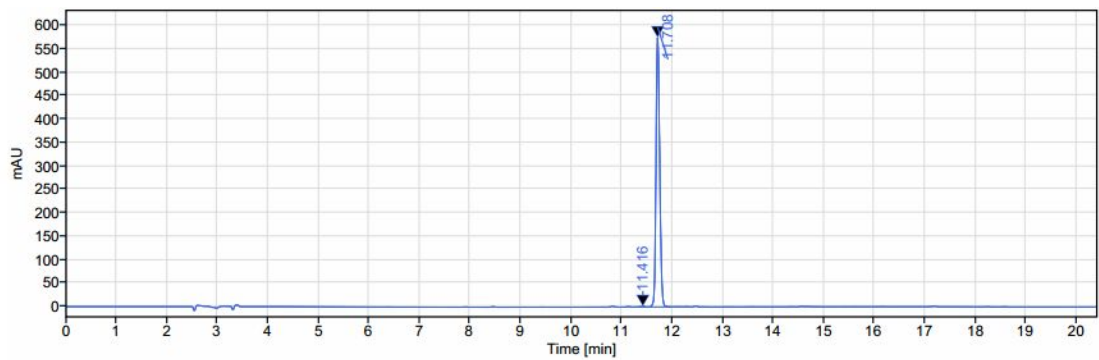

Signal: DAD1A,Sig=254,4 Ref=off

| RT [min]   | Type | Width [min] | Area    | Height | Area%  | Name |
|------------|------|-------------|---------|--------|--------|------|
| 11.416     | VV   | 0.29        | 10.50   | 1.72   | 0.36   |      |
| 11.708     | VV   | 0.48        | 2901.01 | 574.44 | 99.64  |      |
| <b>Sum</b> |      |             | 2911.51 |        | 100.00 |      |

# Compound 12a

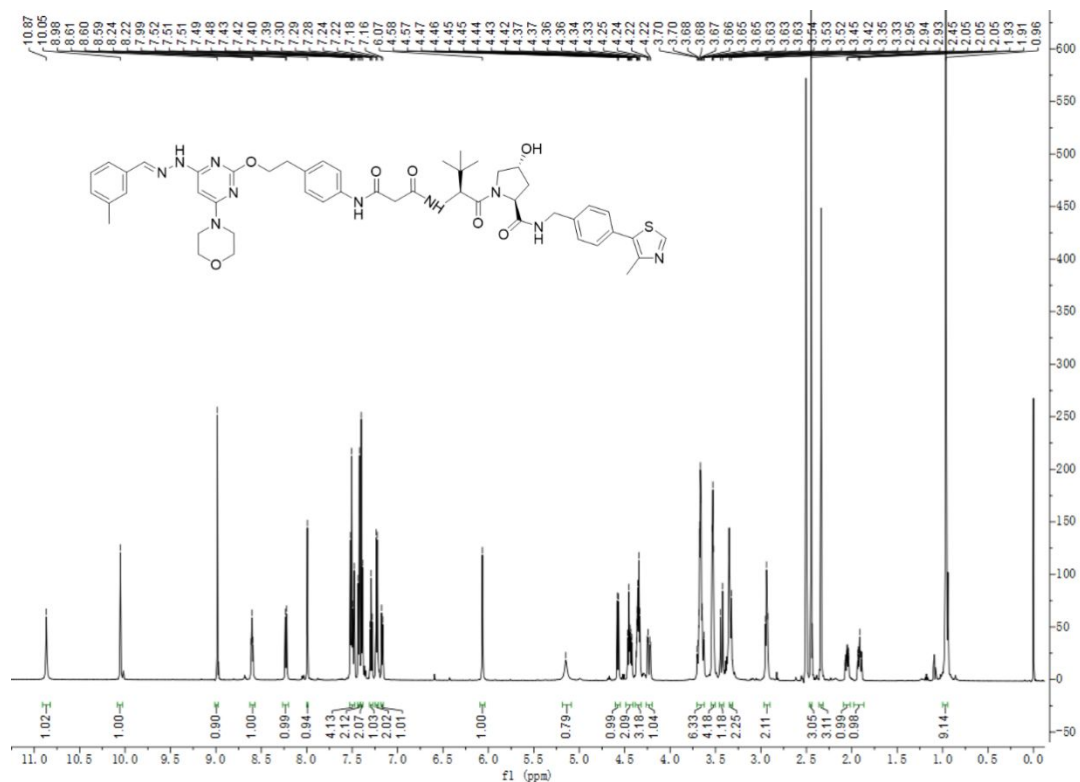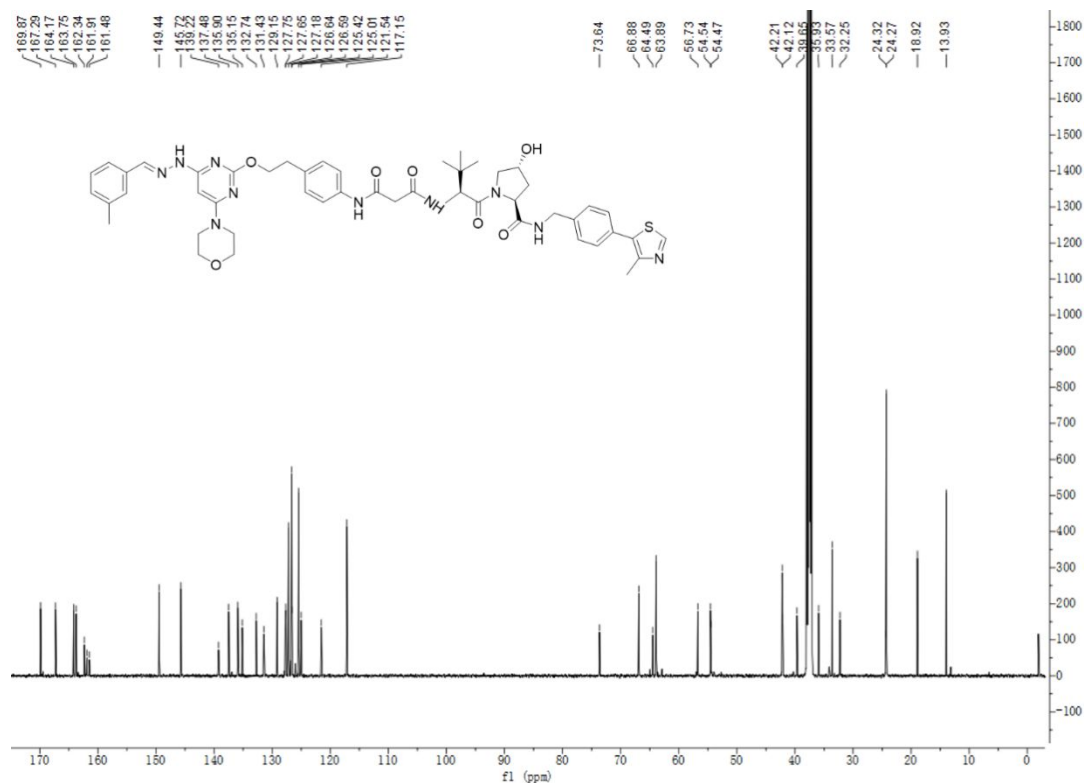



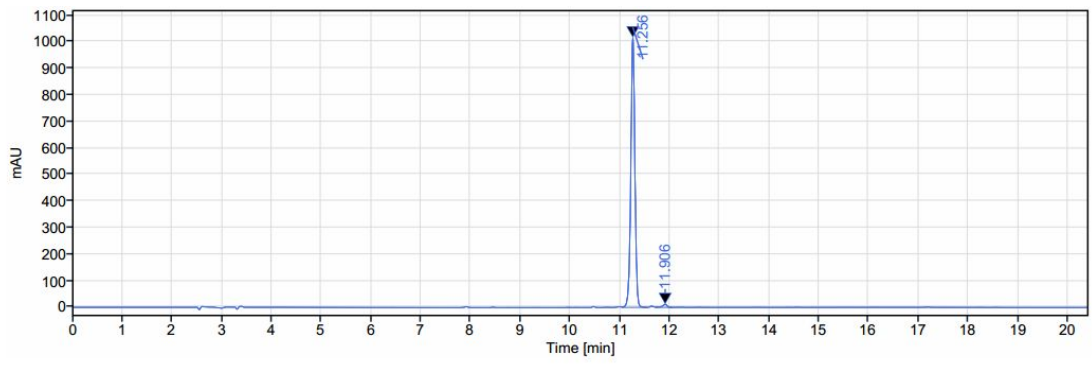

Signal: DAD1A,Sig=254,4 Ref=off

| RT [min]   | Type | Width [min] | Area    | Height  | Area%  | Name |
|------------|------|-------------|---------|---------|--------|------|
| 11.256     | VB   | 0.49        | 5800.71 | 1016.46 | 98.68  |      |
| 11.906     | VB   | 0.34        | 77.57   | 11.73   | 1.32   |      |
| <b>Sum</b> |      |             | 5878.28 |         | 100.00 |      |

# Compound 12b

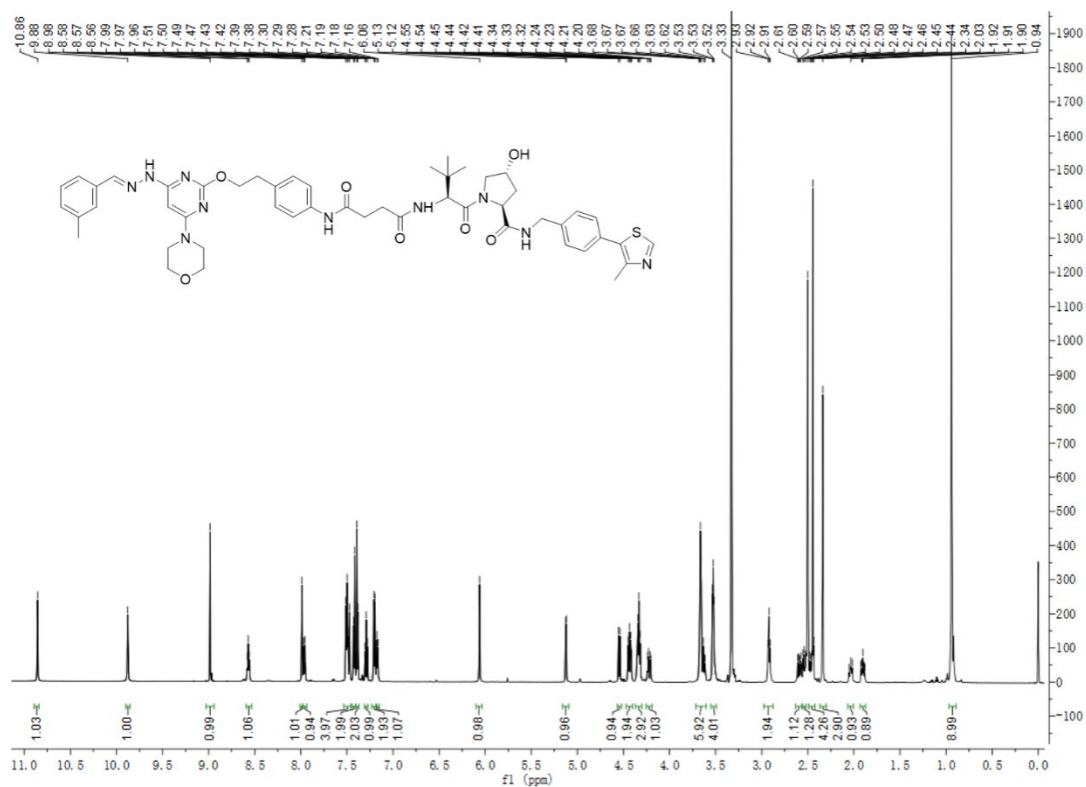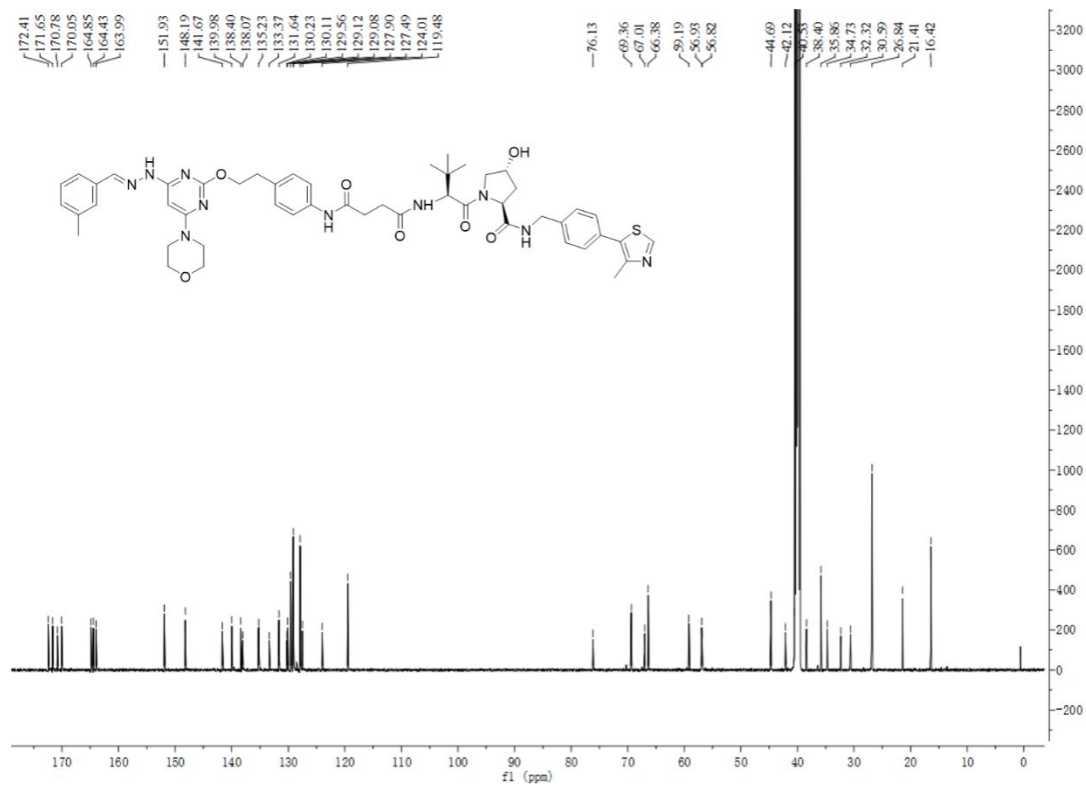

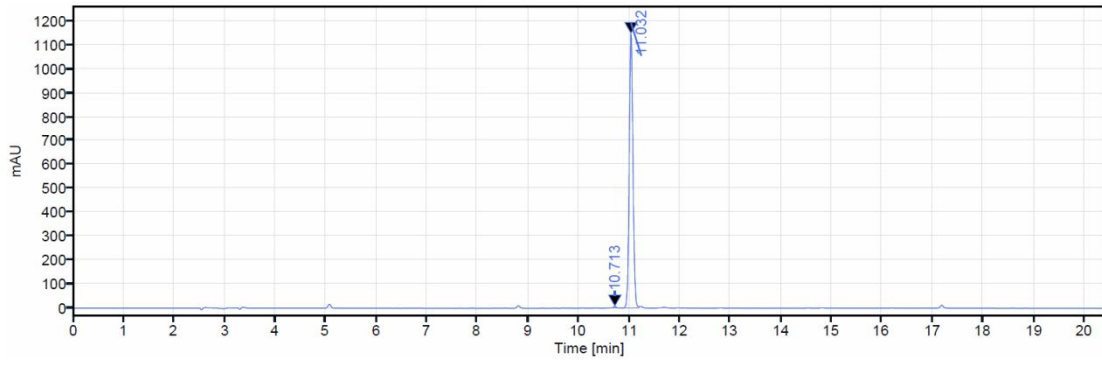

Signal: DAD1A,Sig=254,4 Ref=off

| RT [min] | Type | Width [min] | Area    | Height  | Area%  | Name |
|----------|------|-------------|---------|---------|--------|------|
| 10.713   | MM m | 0.11        | 19.40   | 5.93    | 0.33   |      |
| 11.032   | BV   | 0.32        | 5896.41 | 1147.04 | 99.67  |      |
|          |      | <b>Sum</b>  | 5915.81 |         | 100.00 |      |

Compound 12c

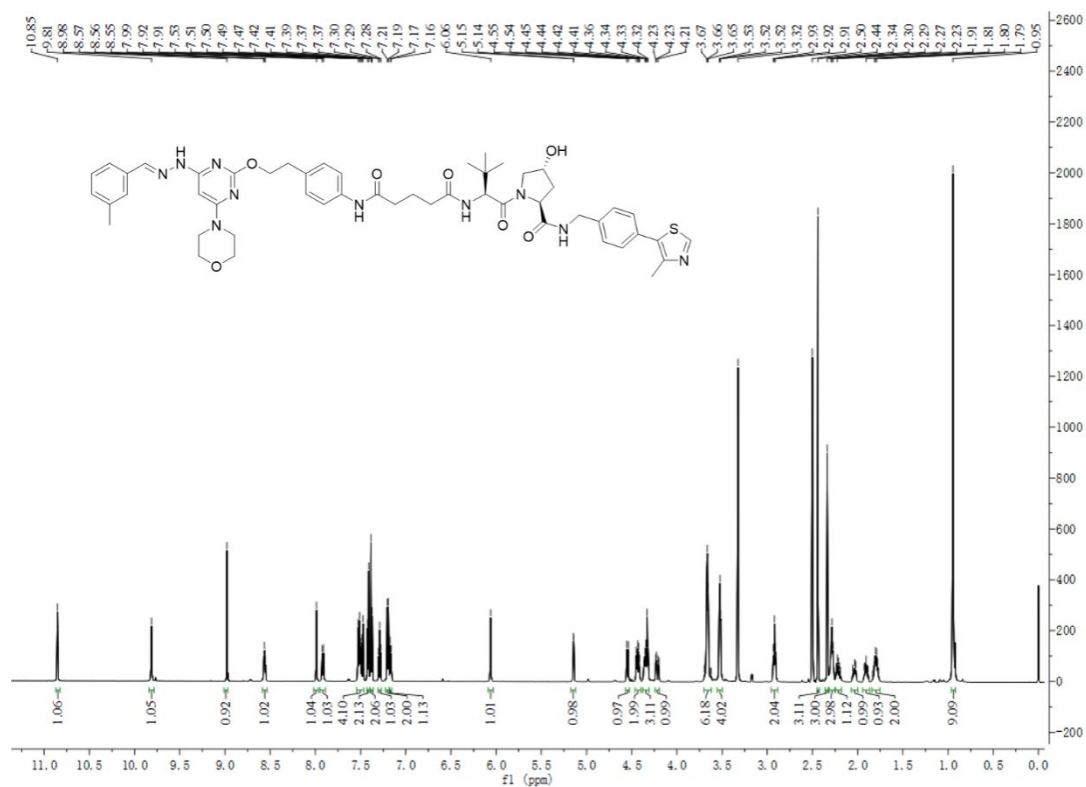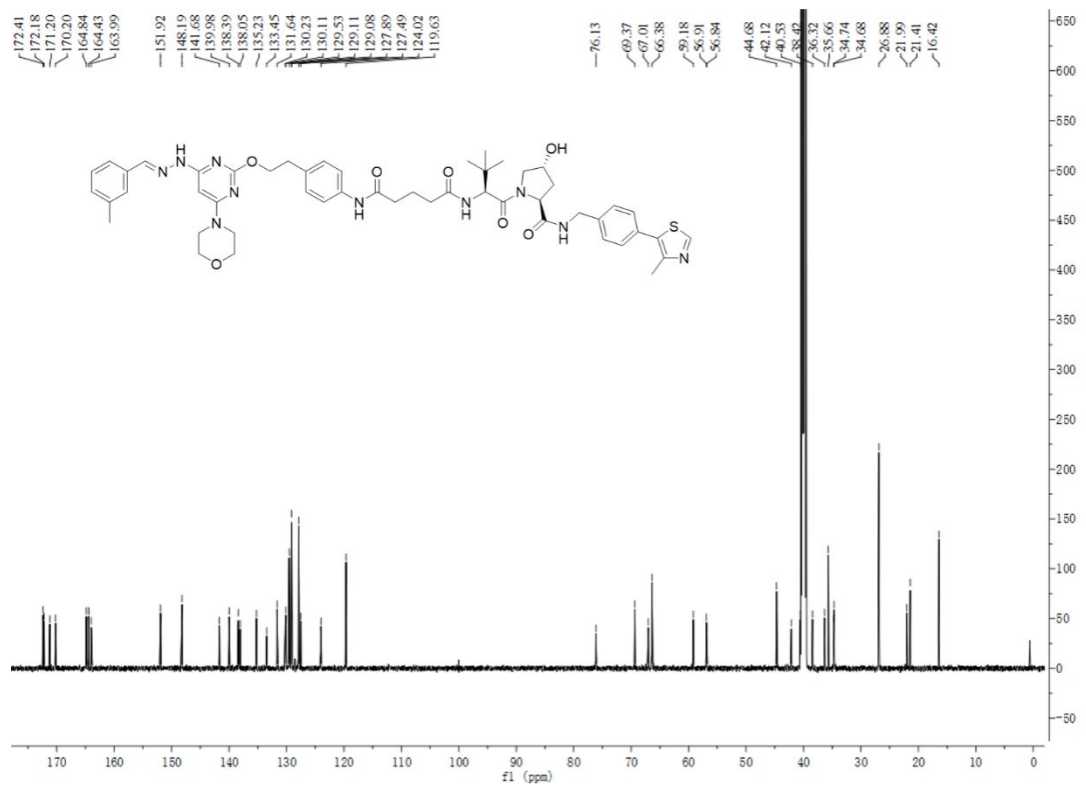

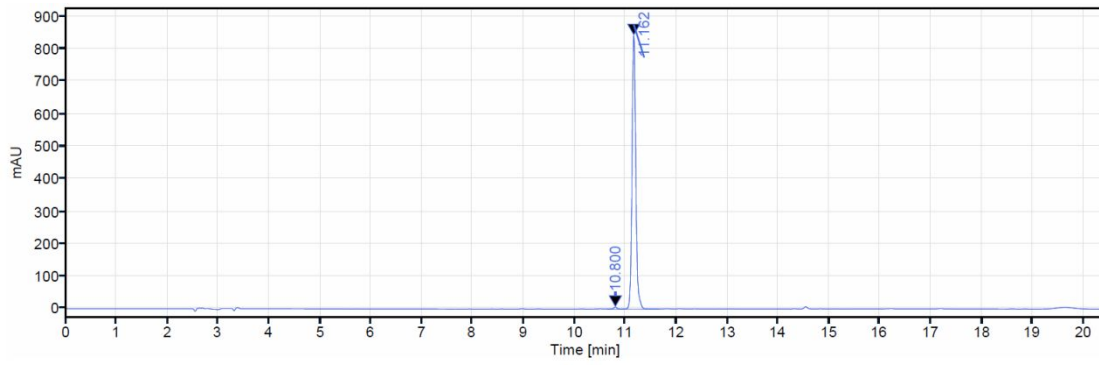

Signal: DAD1A,Sig=254,4 Ref=off

| RT [min] | Type | Width [min] | Area    | Height | Area%  | Name |
|----------|------|-------------|---------|--------|--------|------|
| 10.800   | VV   | 0.30        | 31.43   | 6.64   | 0.72   |      |
| 11.162   | VV   | 0.73        | 4311.28 | 842.84 | 99.28  |      |
|          |      | <b>Sum</b>  | 4342.71 |        | 100.00 |      |

# Compound 12d

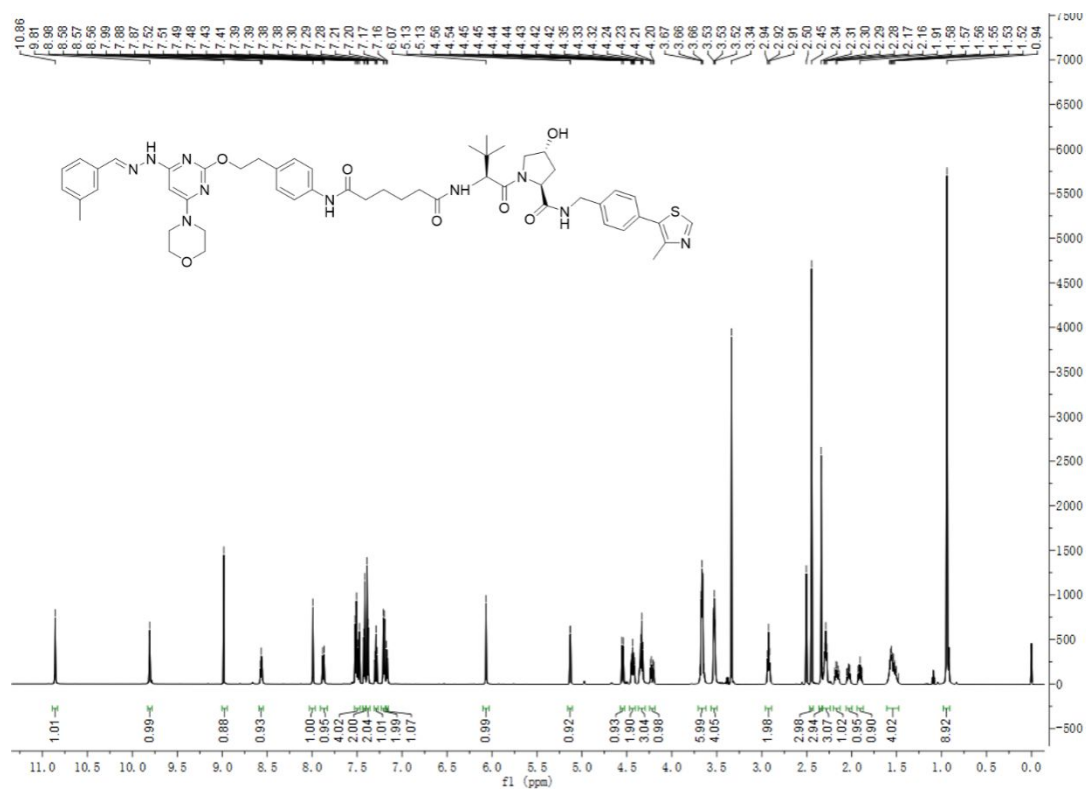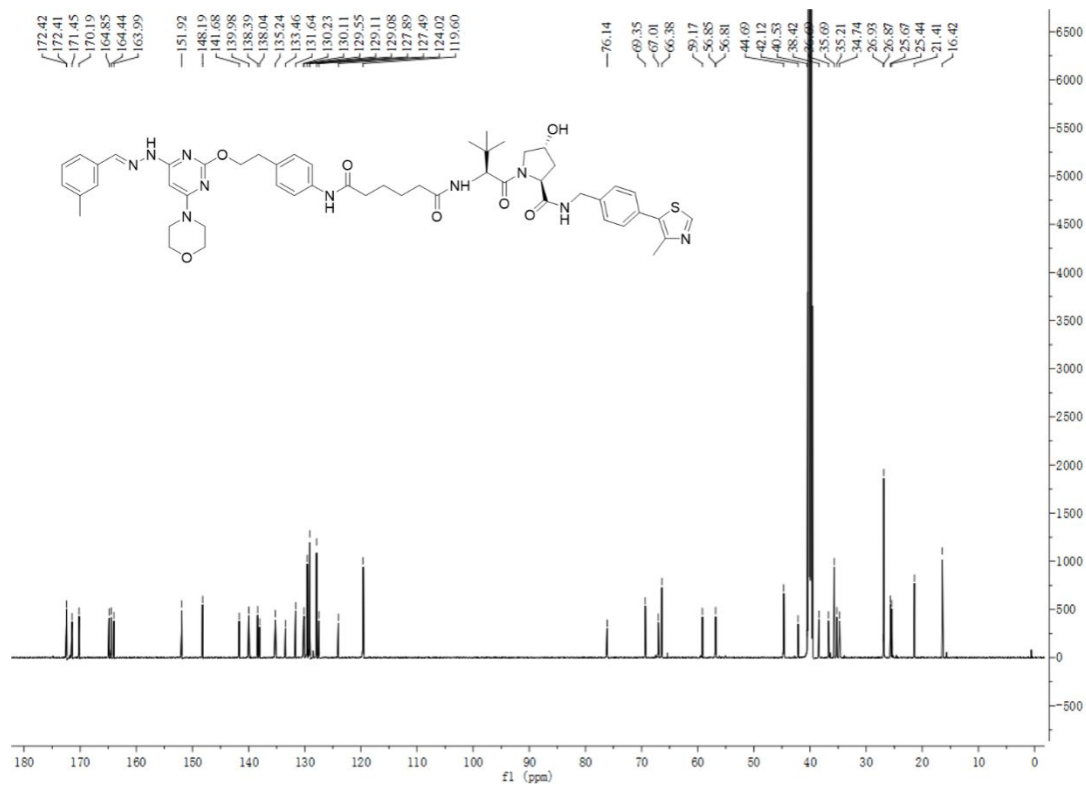

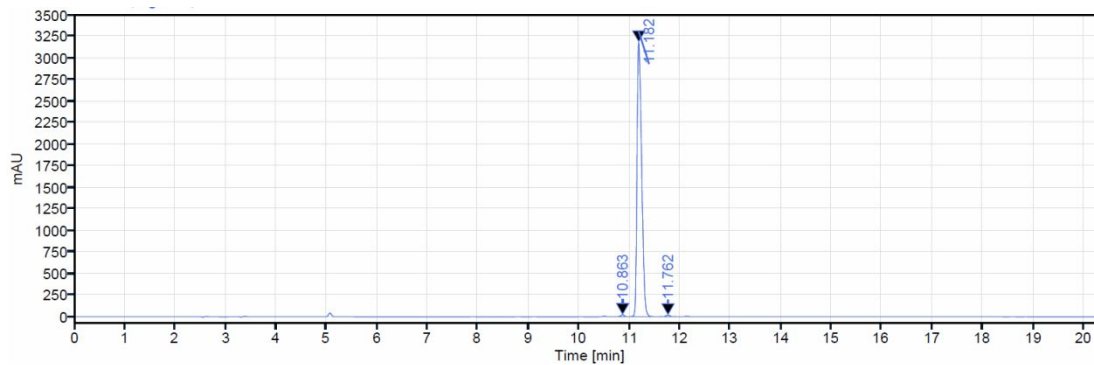

Signal: DAD1A,Sig=254,4 Ref=off

| RT [min]   | Type | Width [min] | Area     | Height  | Area%  | Name |
|------------|------|-------------|----------|---------|--------|------|
| 10.863     | VB   | 0.22        | 106.41   | 22.51   | 0.52   |      |
| 11.182     | BB   | 0.59        | 20180.56 | 3185.79 | 99.00  |      |
| 11.762     | VV   | 0.20        | 98.33    | 19.57   | 0.48   |      |
| <b>Sum</b> |      |             | 20385.29 |         | 100.00 |      |

# Compound 12e

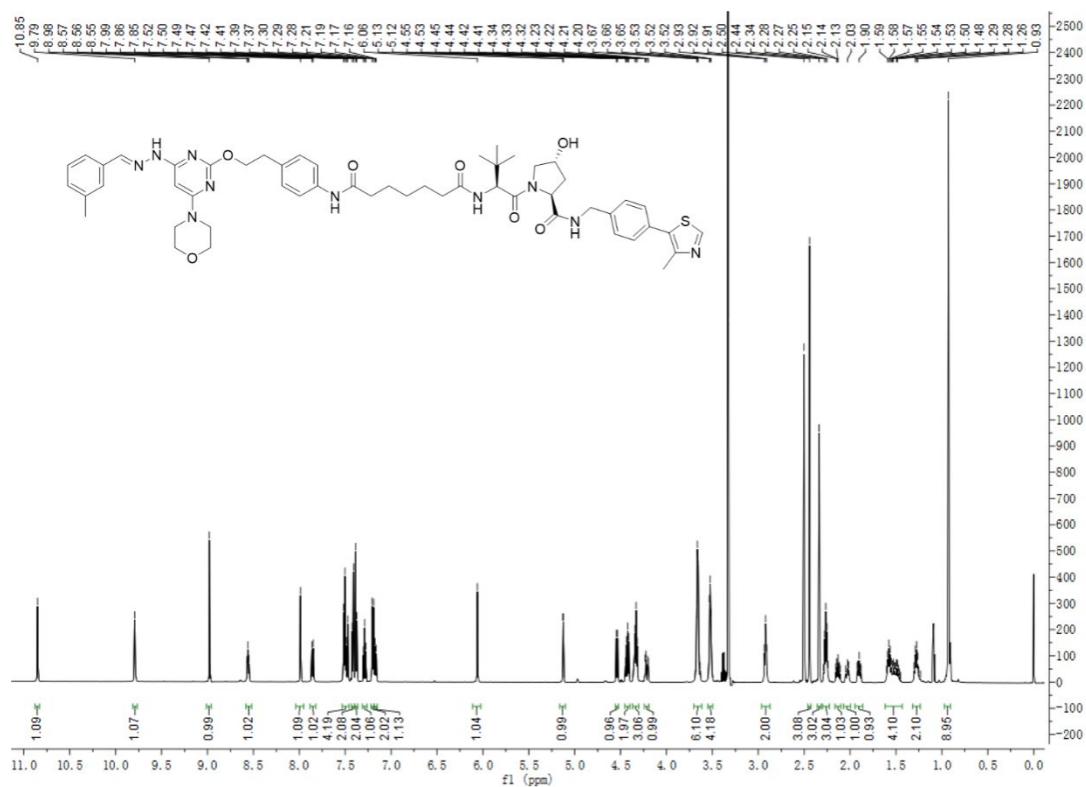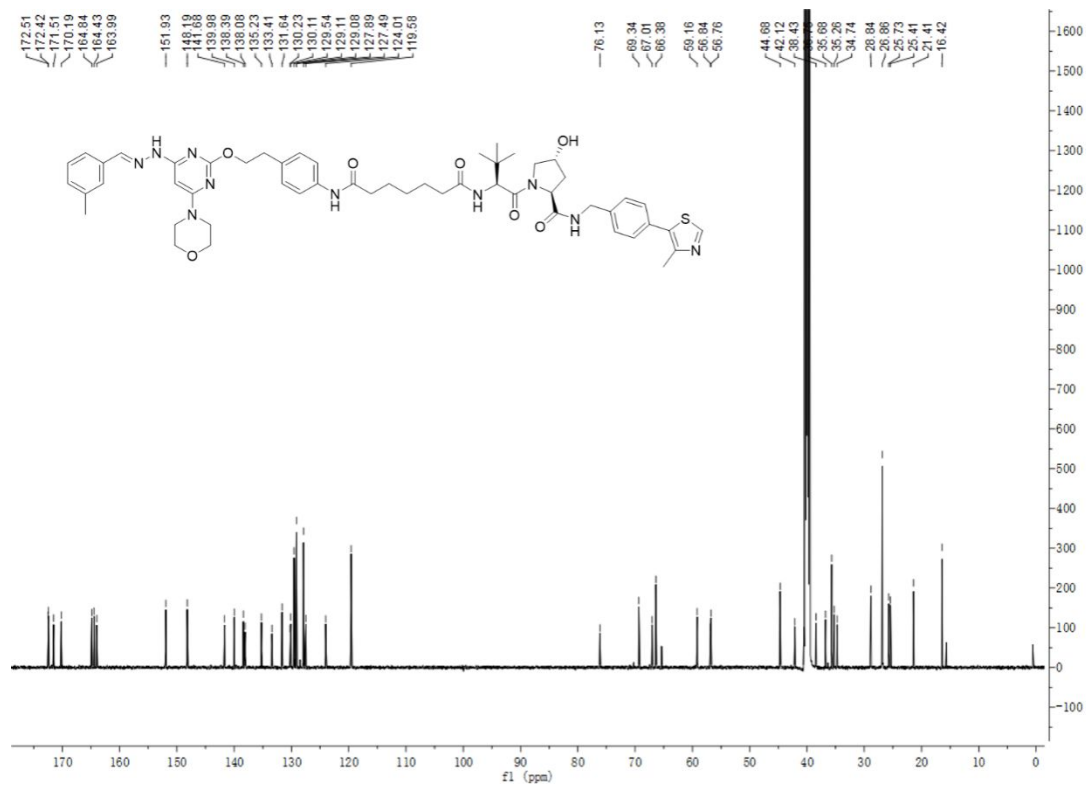



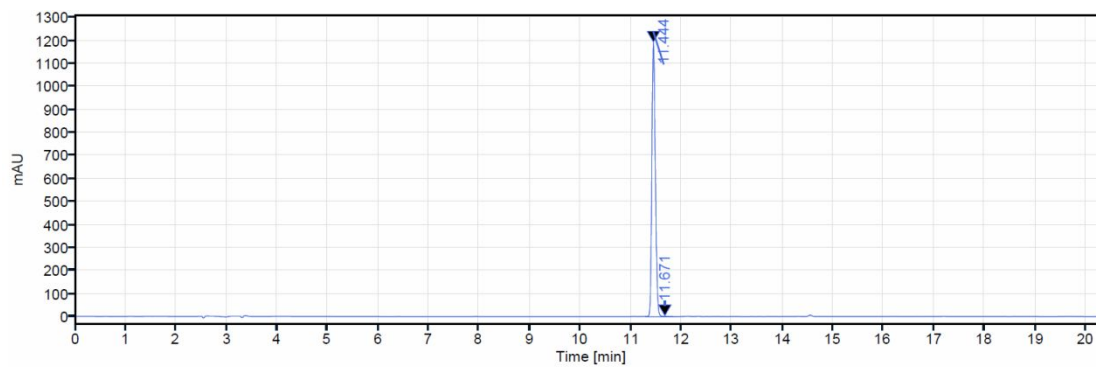

Signal: DAD1A,Sig=254,4 Ref=off

| RT [min]   | Type | Width [min] | Area    | Height  | Area%  | Name |
|------------|------|-------------|---------|---------|--------|------|
| 11.444     | VV   | 0.35        | 5748.64 | 1192.91 | 99.85  |      |
| 11.671     | VB   | 0.24        | 8.86    | 1.85    | 0.15   |      |
| <b>Sum</b> |      |             | 5757.50 |         | 100.00 |      |

# Compound 12f

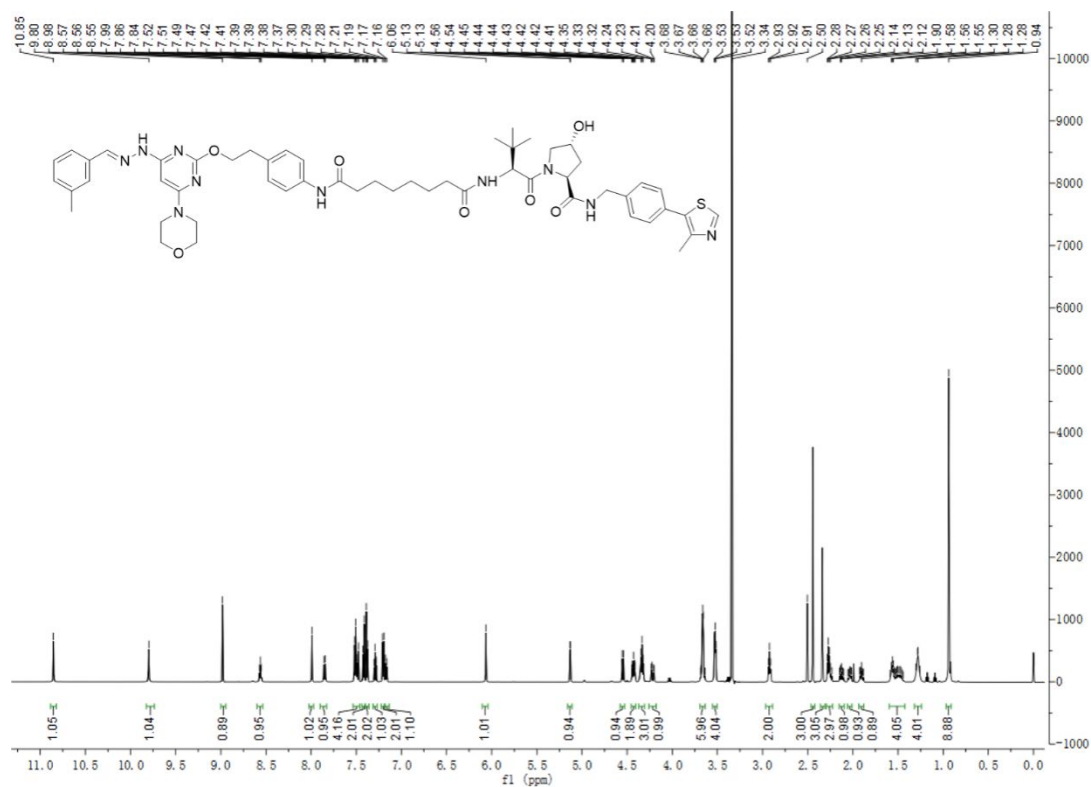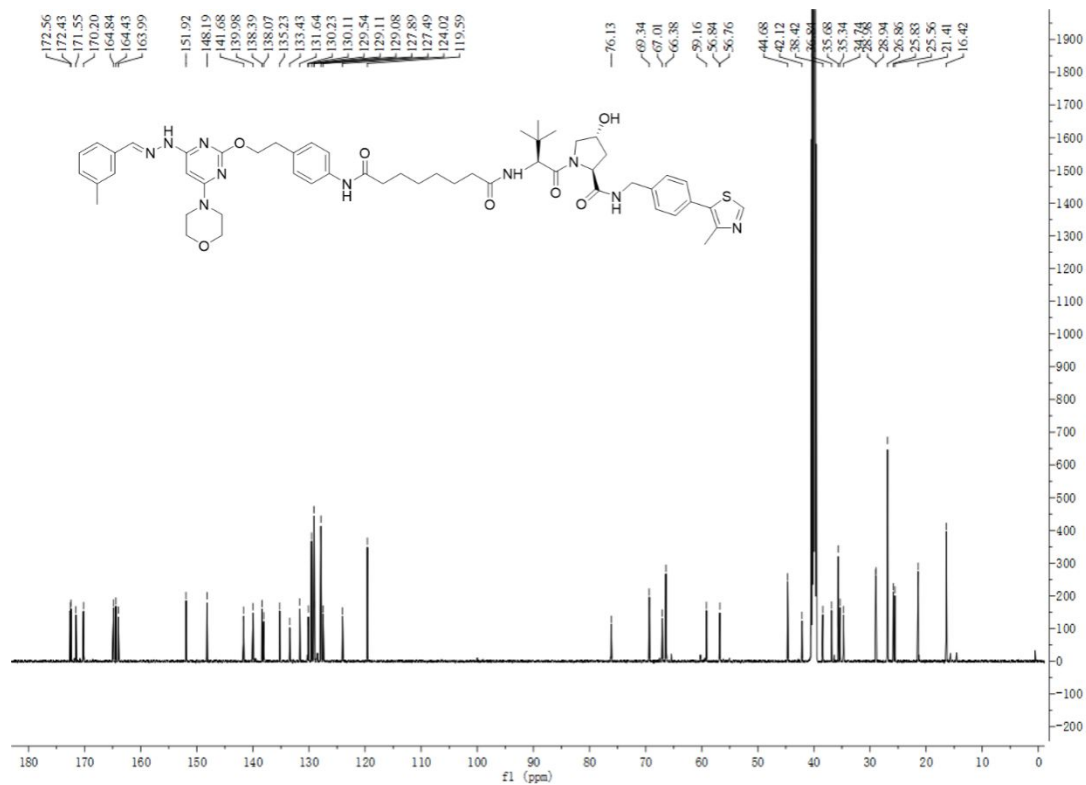

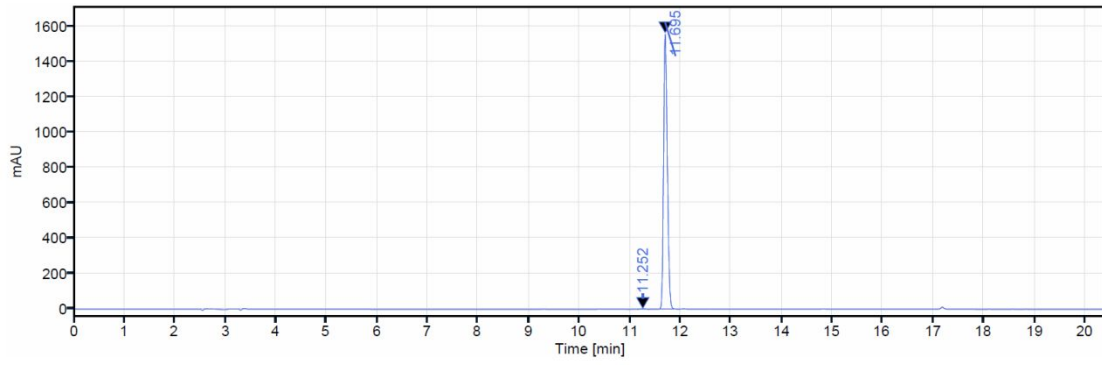

Signal: DAD1A,Sig=254,4 Ref=off

| RT [min] | Type | Width [min] | Area    | Height  | Area%  | Name |
|----------|------|-------------|---------|---------|--------|------|
| 11.252   | VB   | 0.26        | 21.25   | 2.48    | 0.26   |      |
| 11.695   | BV   | 0.56        | 8063.57 | 1564.25 | 99.74  |      |
|          |      | <b>Sum</b>  | 8084.82 |         | 100.00 |      |

# Compound 12g

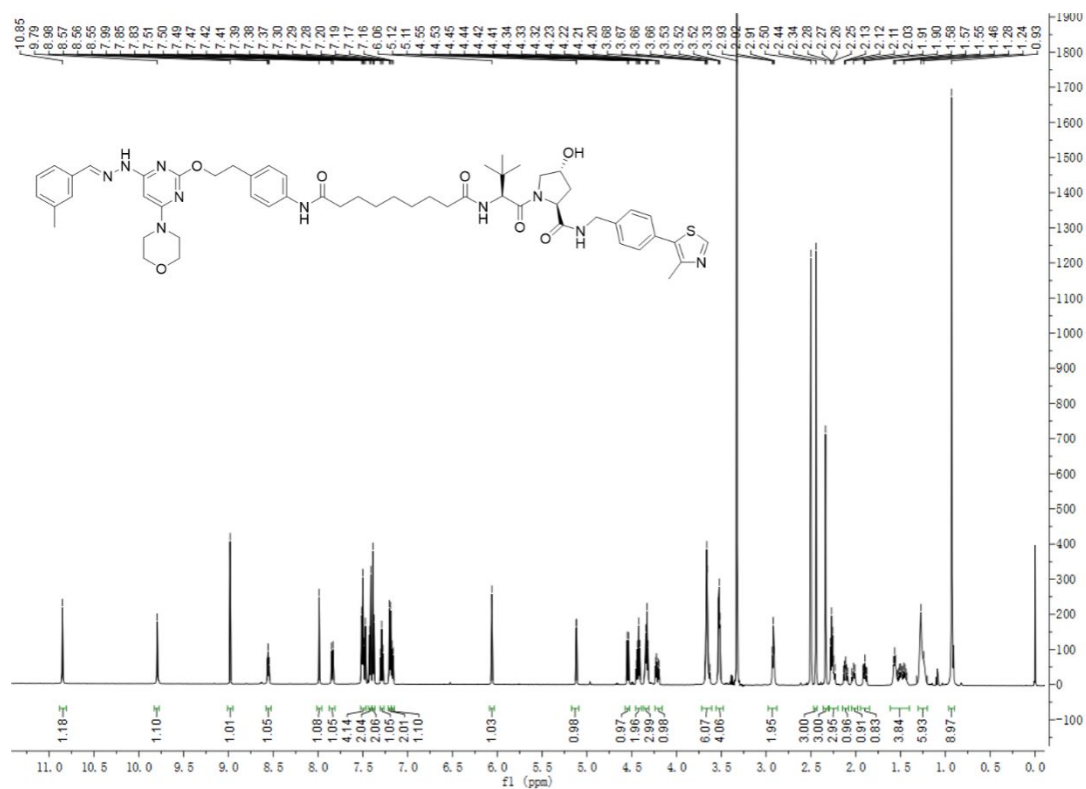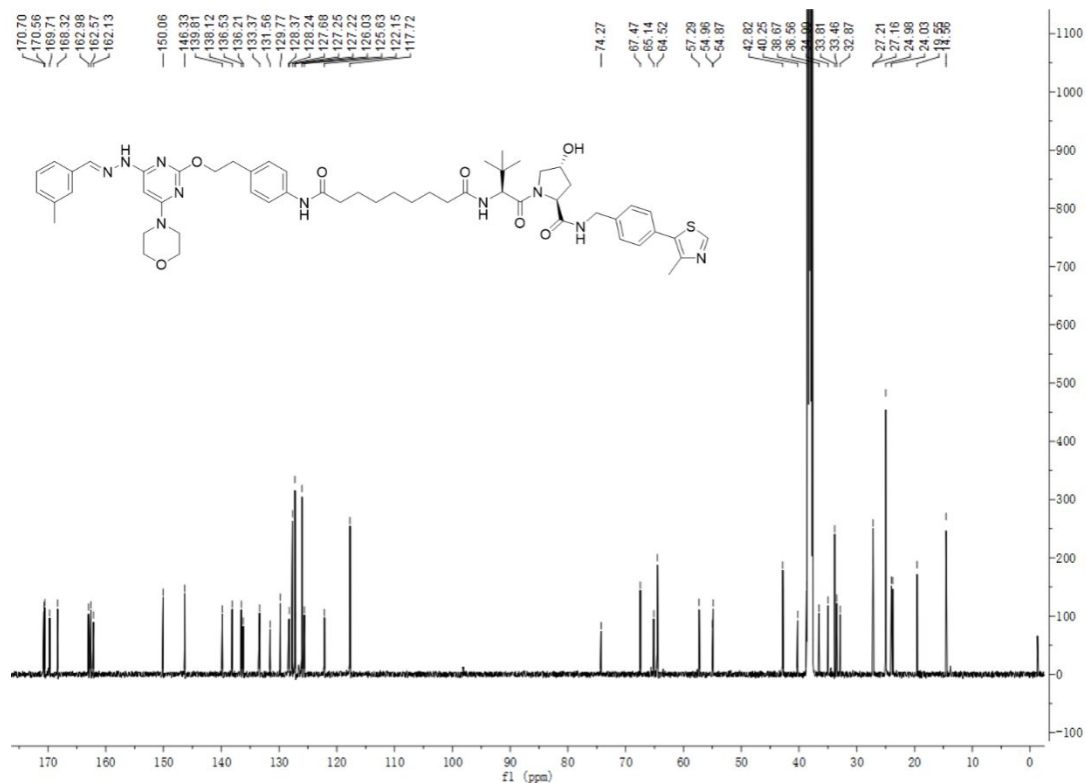

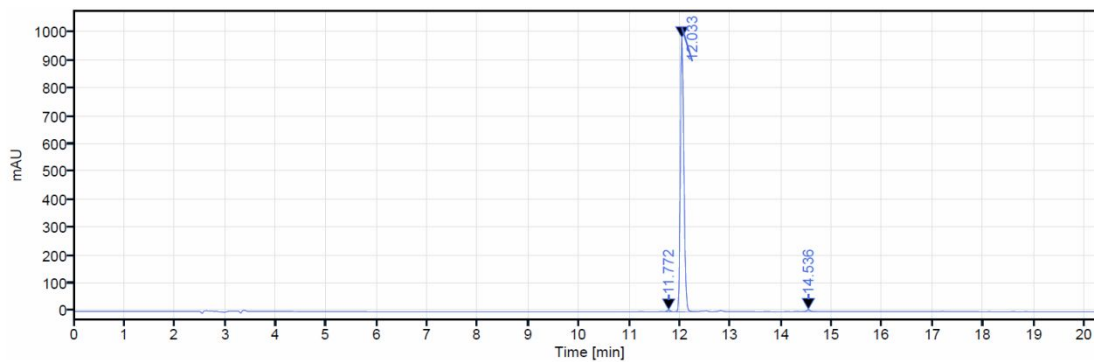

Signal: DAD1A,Sig=254,4 Ref=off

| RT [min]   | Type | Width [min] | Area    | Height | Area%  | Name |
|------------|------|-------------|---------|--------|--------|------|
| 11.772     | VB   | 0.19        | 23.32   | 5.25   | 0.48   |      |
| 12.033     | BB   | 0.46        | 4783.57 | 982.78 | 98.87  |      |
| 14.536     | VB   | 0.27        | 31.17   | 6.84   | 0.64   |      |
| <b>Sum</b> |      |             | 4838.07 |        | 100.00 |      |

# Compound 12h

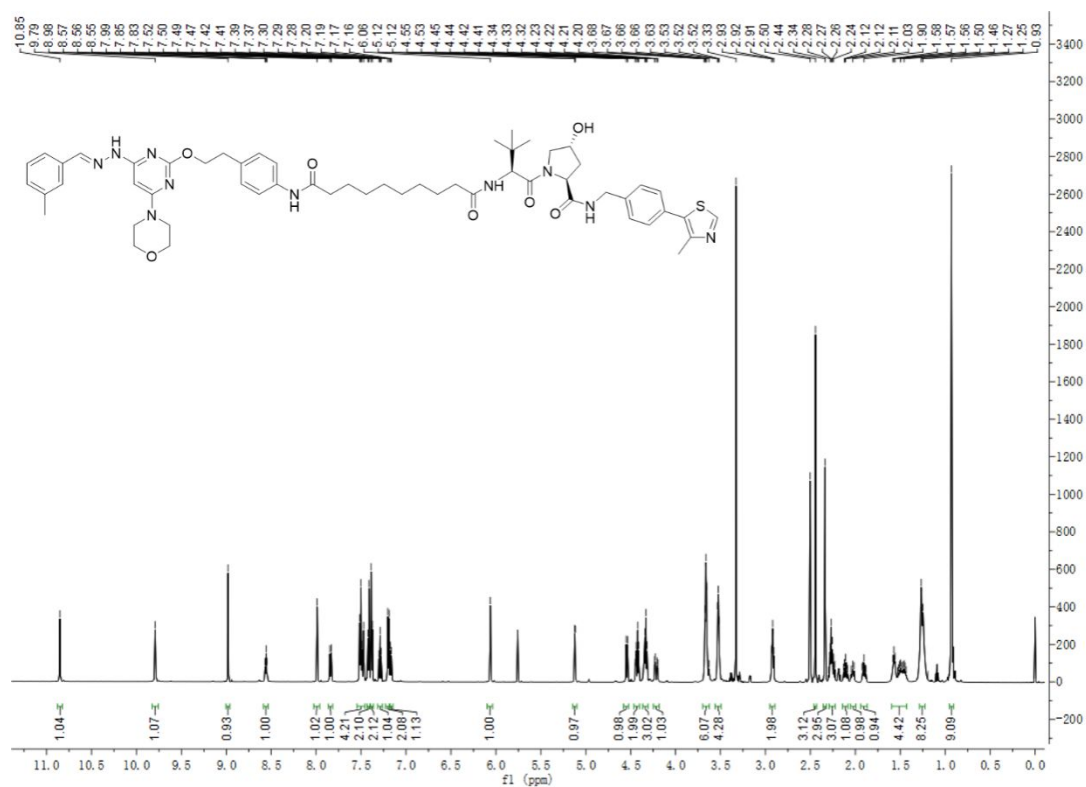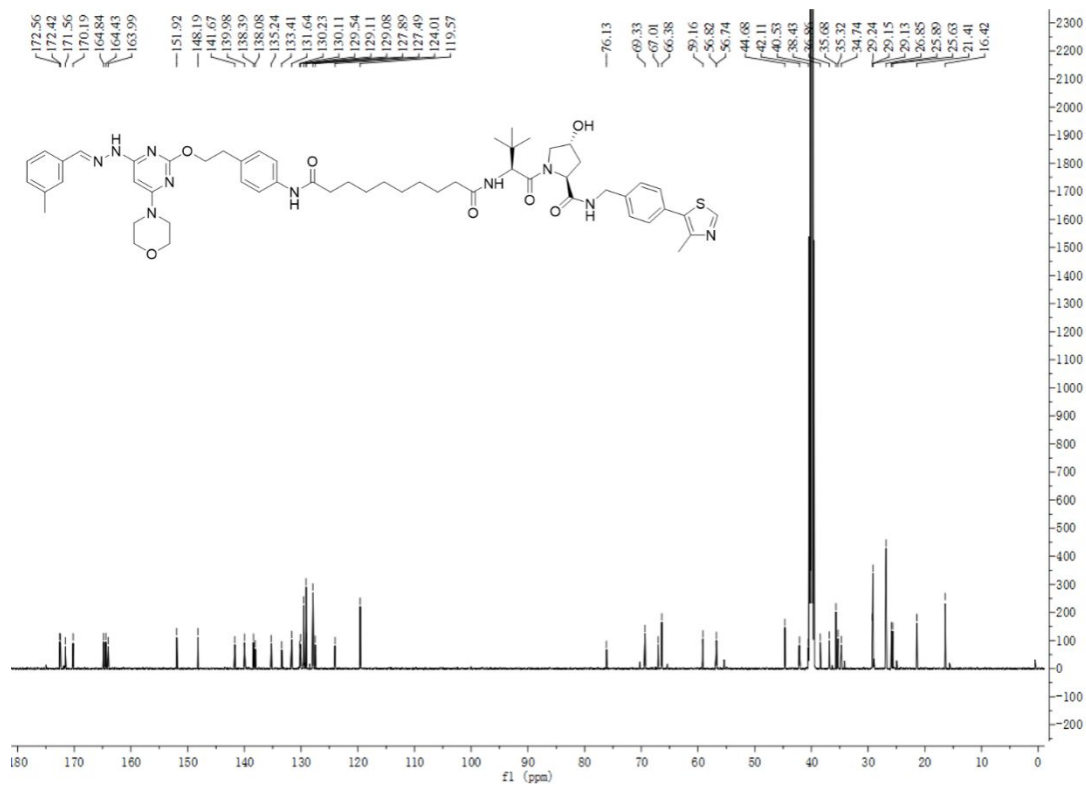

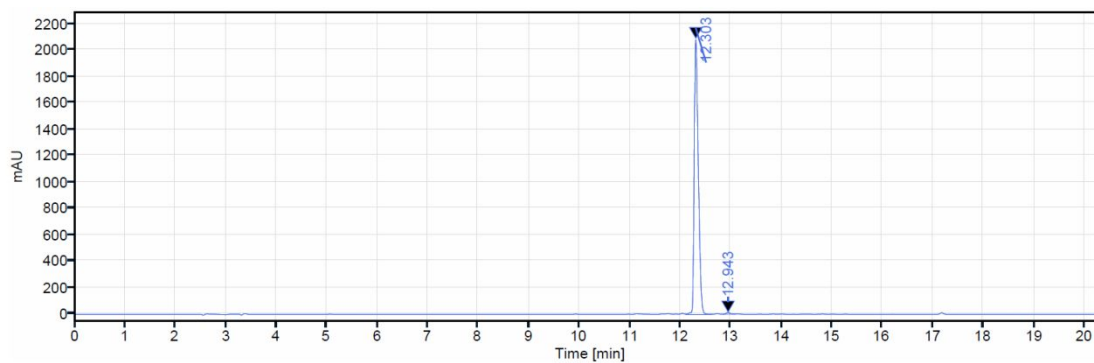

Signal: DAD1A,Sig=254,4 Ref=off

| RT [min]   | Type | Width [min] | Area     | Height  | Area%  | Name |
|------------|------|-------------|----------|---------|--------|------|
| 12.303     | VB   | 0.51        | 11762.95 | 2084.50 | 99.35  |      |
| 12.943     | BV   | 0.24        | 77.33    | 14.17   | 0.65   |      |
| <b>Sum</b> |      |             | 11840.29 |         | 100.00 |      |

# Compound 12i

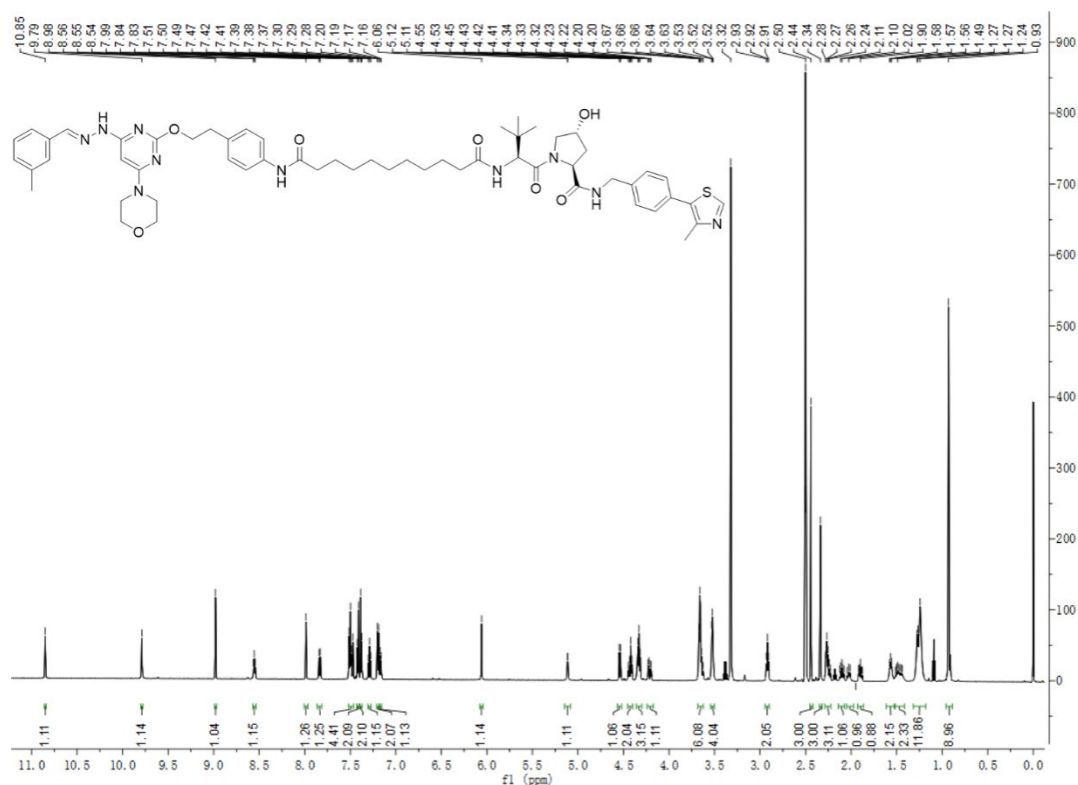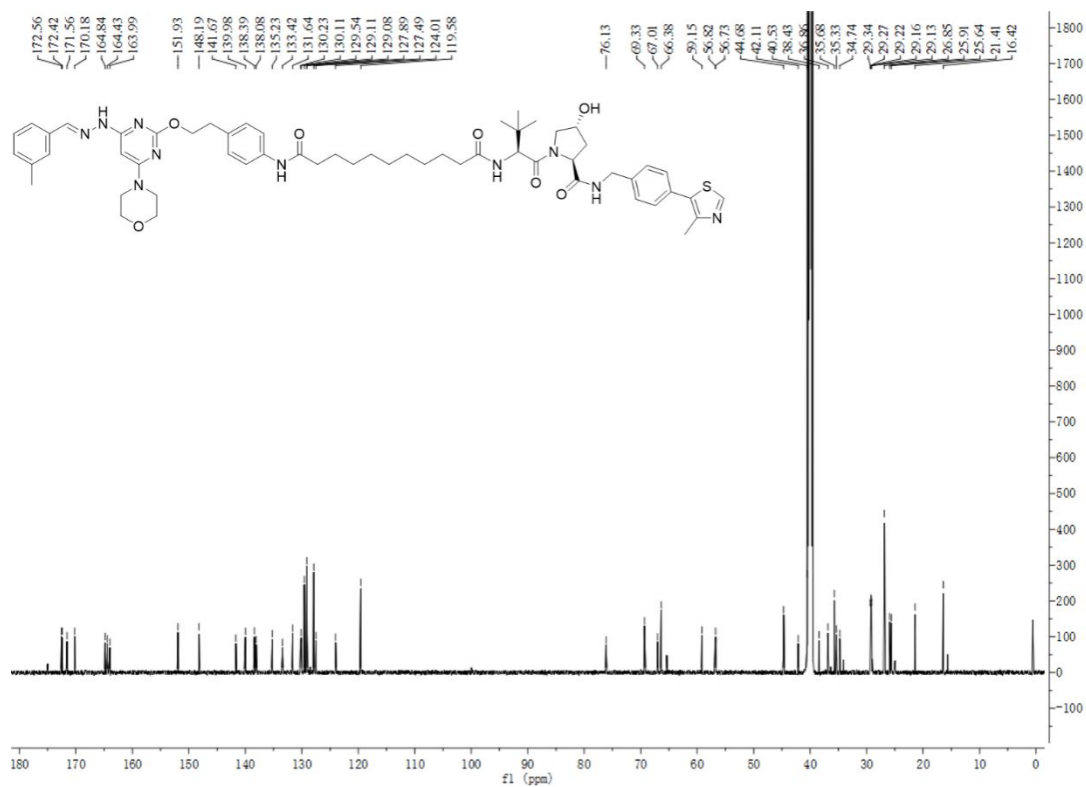



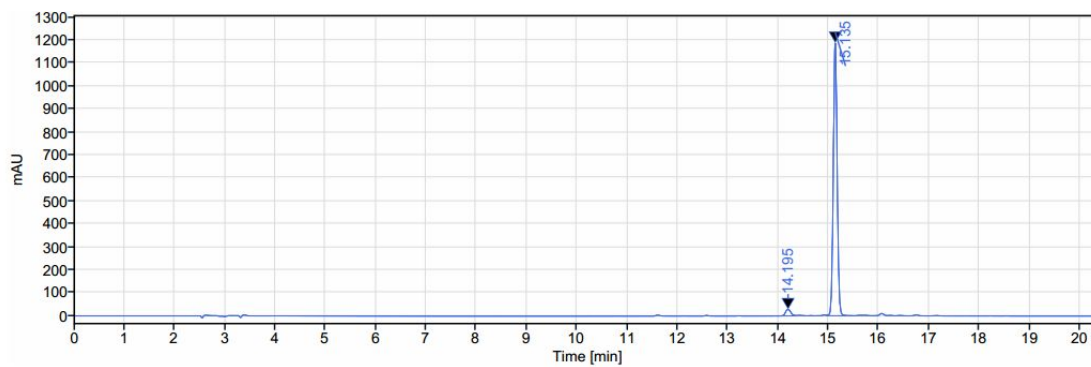

Signal: DAD1A,Sig=254,4 Ref=off

| RT [min] | Type | Width [min] | Area    | Height  | Area%  | Name |
|----------|------|-------------|---------|---------|--------|------|
| 14.195   | BV   | 0.37        | 209.99  | 27.74   | 3.19   |      |
| 15.135   | VB   | 0.55        | 6364.19 | 1187.27 | 96.81  |      |
|          |      | <b>Sum</b>  | 6574.18 |         | 100.00 |      |

# Compound 12j

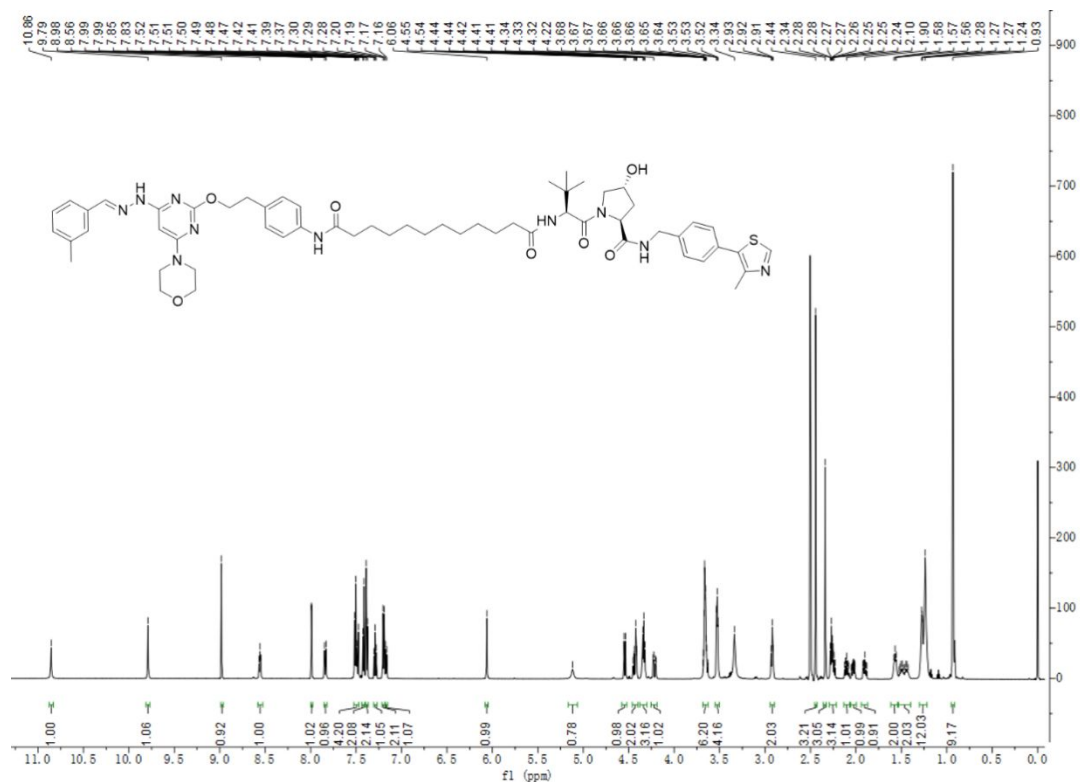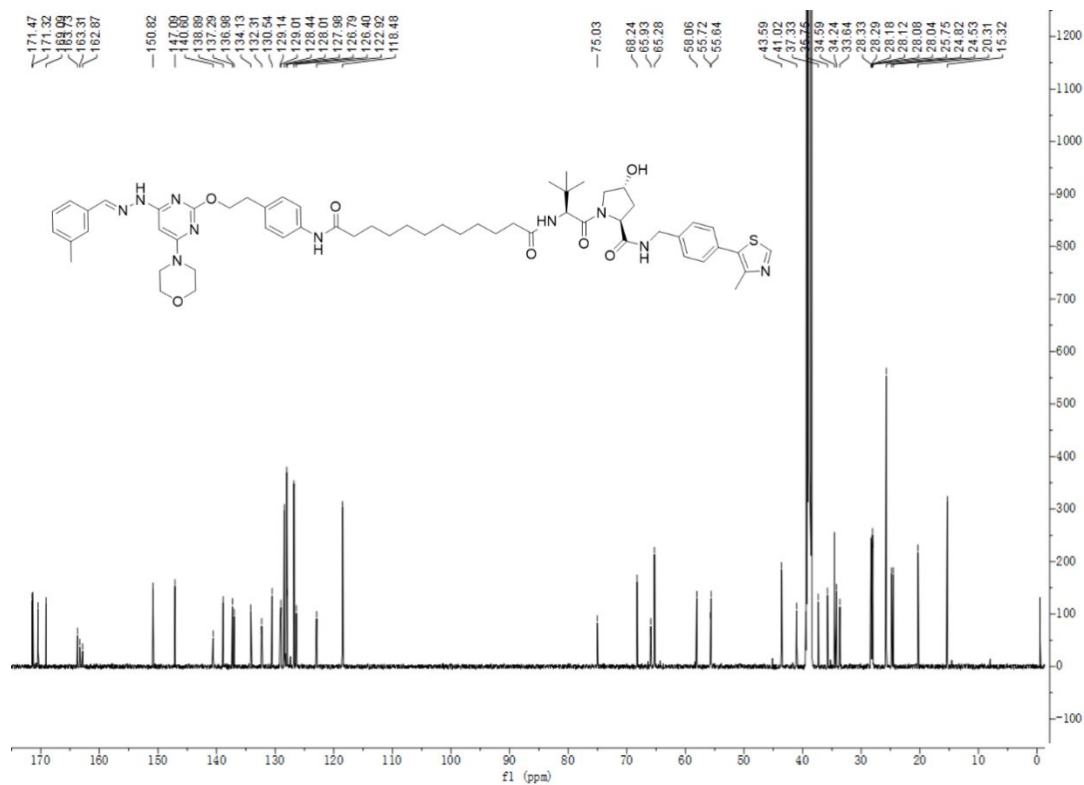

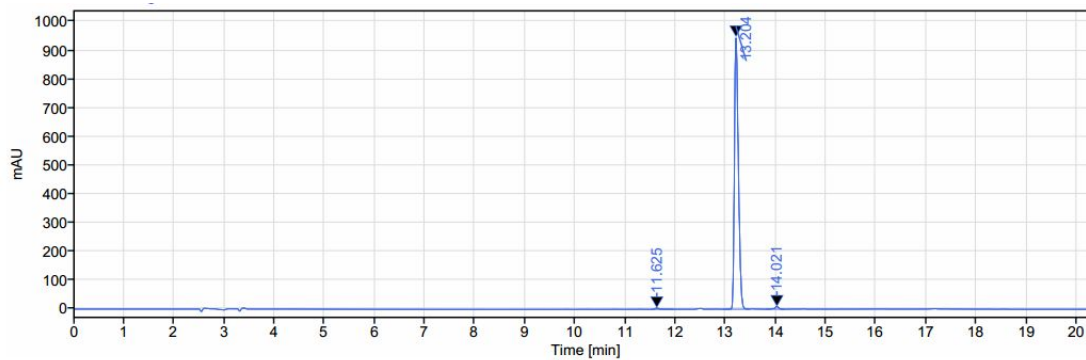

Signal: DAD1A,Sig=254,4 Ref=off

| RT [min]   | Type | Width [min] | Area    | Height | Area%  | Name |
|------------|------|-------------|---------|--------|--------|------|
| 11.625     | BB   | 0.46        | 26.19   | 4.53   | 0.50   |      |
| 13.204     | BV   | 0.53        | 5207.71 | 947.49 | 98.53  |      |
| 14.021     | BB   | 0.37        | 51.76   | 9.03   | 0.98   |      |
| <b>Sum</b> |      |             | 5285.66 |        | 100.00 |      |

# Compound 13a

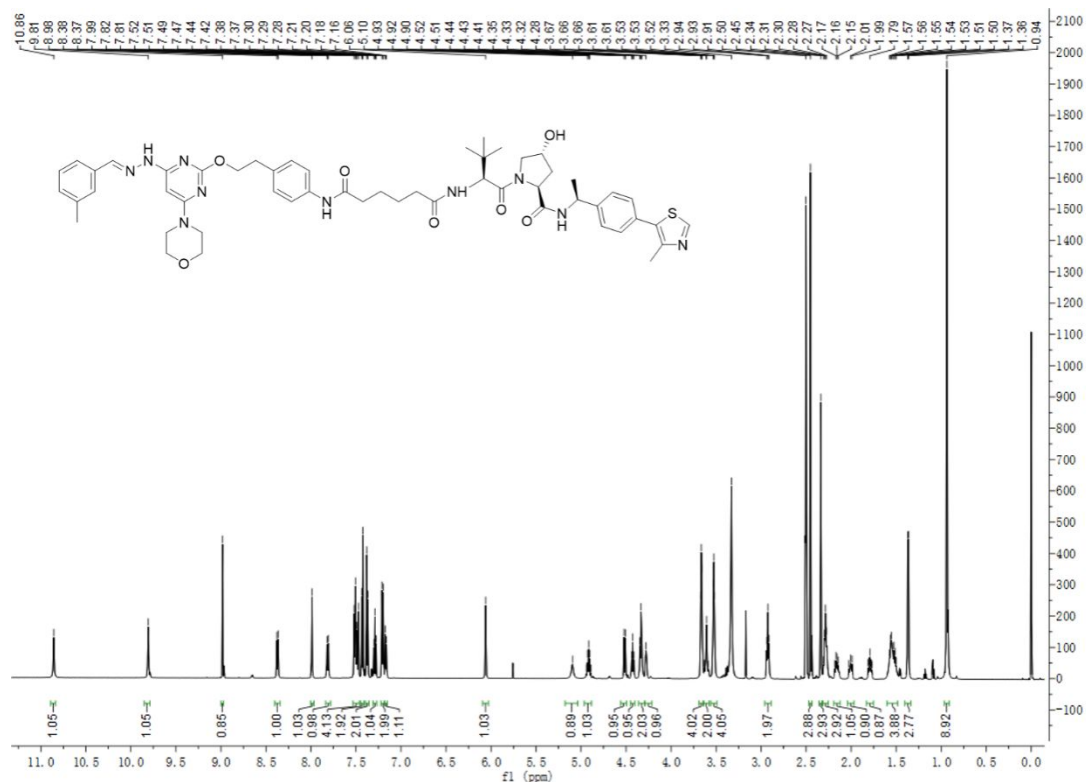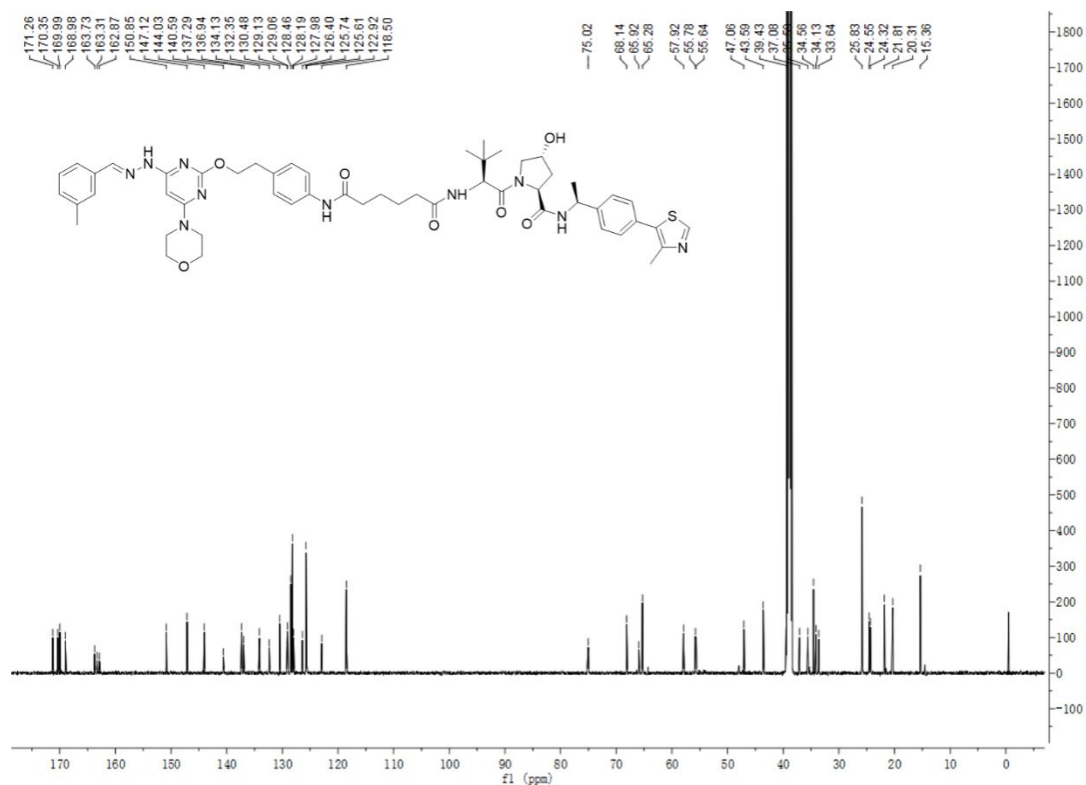

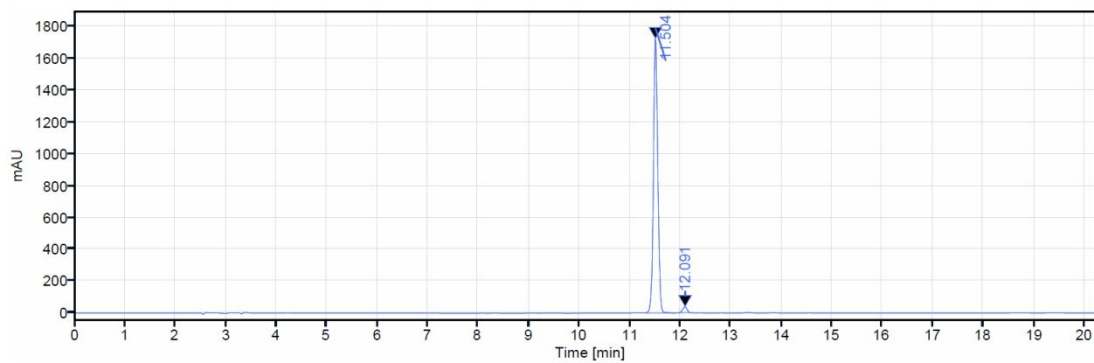

Signal: DAD1A,Sig=254,4 Ref=off

| RT [min]   | Type | Width [min] | Area     | Height  | Area%  | Name |
|------------|------|-------------|----------|---------|--------|------|
| 11.504     | VM m | 0.59        | 10338.98 | 1726.43 | 97.91  |      |
| 12.091     | MM m | 0.32        | 220.46   | 37.12   | 2.09   |      |
| <b>Sum</b> |      |             | 10559.44 |         | 100.00 |      |

# Compound 12dN

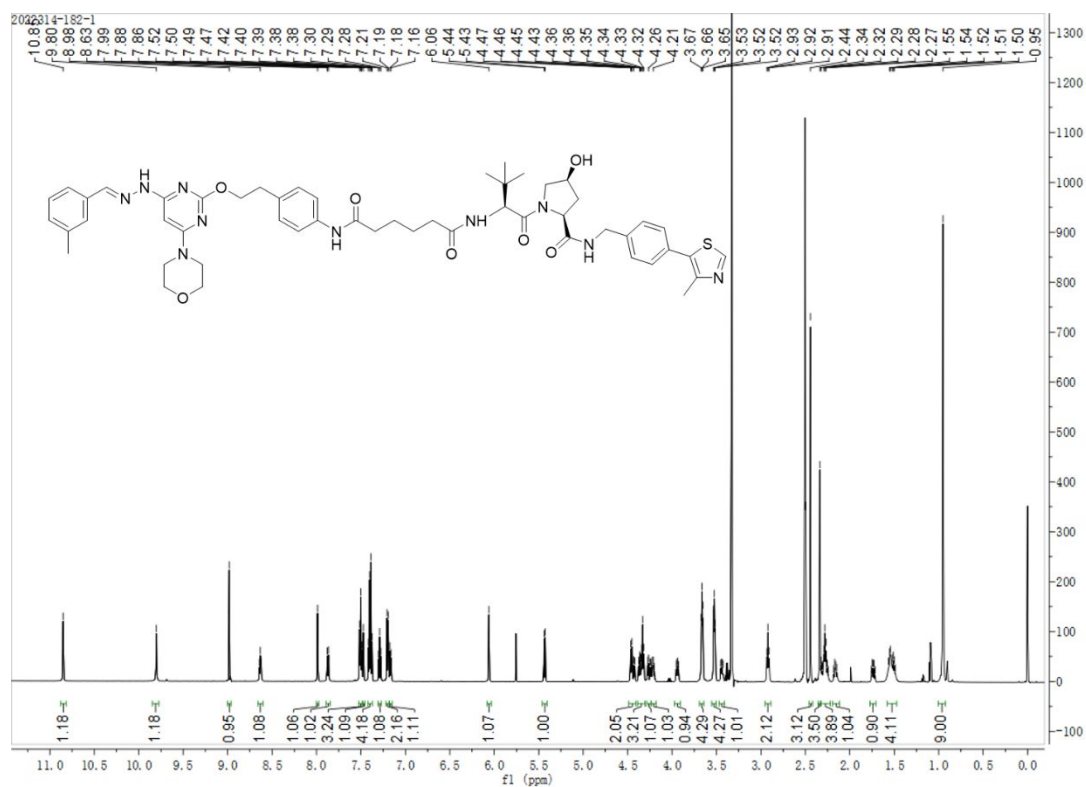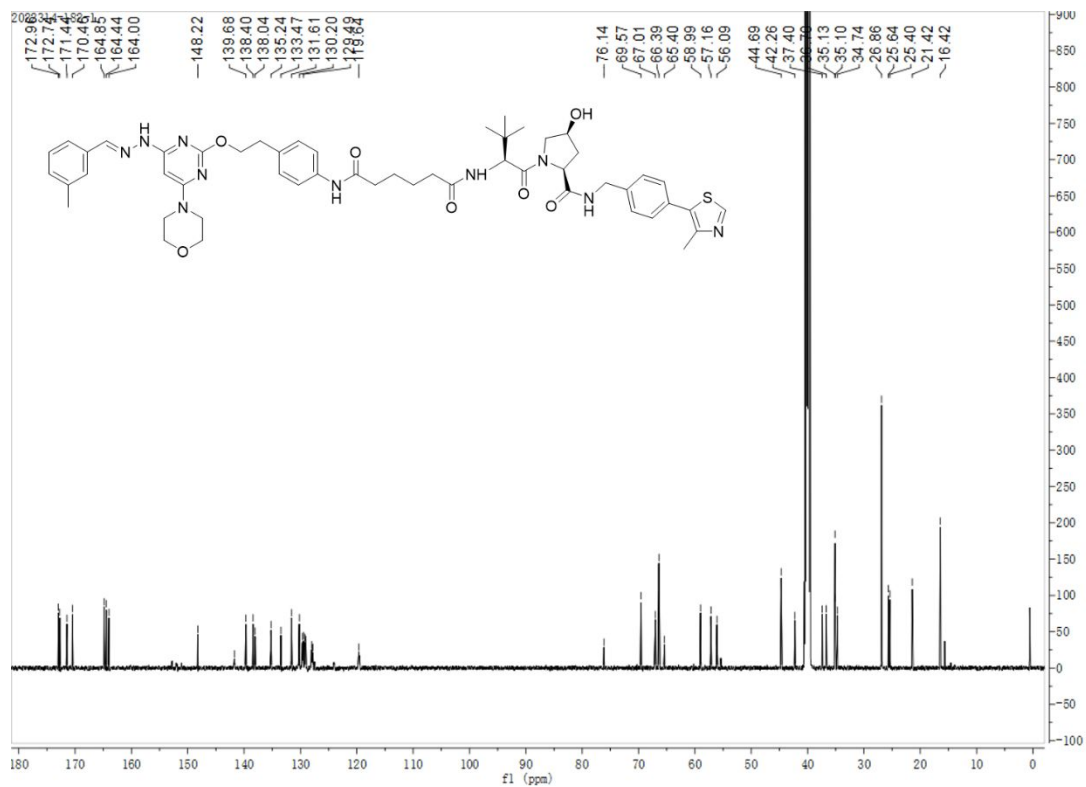

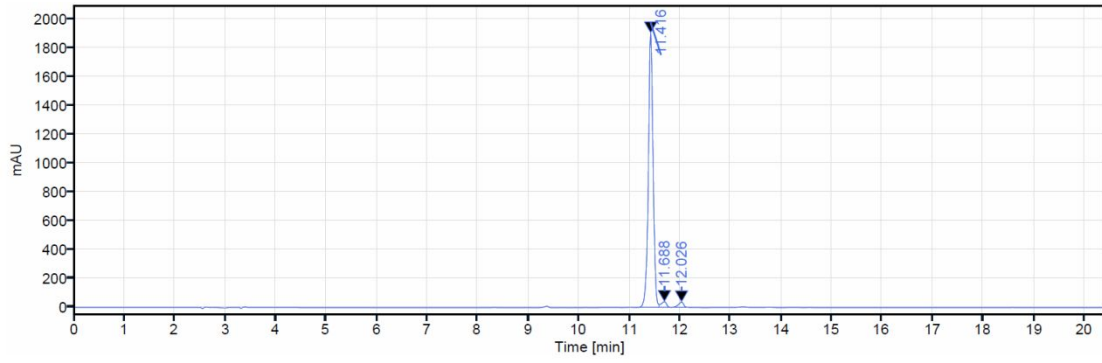

Signal: DAD1A,Sig=254,4 Ref=off

| RT [min]   | Type | Width [min] | Area     | Height  | Area%  | Name |
|------------|------|-------------|----------|---------|--------|------|
| 11.416     | MV m | 0.45        | 12348.51 | 1898.63 | 95.44  |      |
| 11.688     | VV   | 0.23        | 304.65   | 40.06   | 2.35   |      |
| 12.026     | VB   | 0.42        | 285.92   | 37.39   | 2.21   |      |
| <b>Sum</b> |      |             | 12939.08 |         | 100.00 |      |
